# Supplementary material for: Arctic regional changes revealed by clustering of sea-ice observations
Source: Copernicus journal article supplement (doi:10.5194/egusphere-2025-704), 2025-03-06
Supplement: Supplementary file [file egusphere-2025-704-AC1-supplement.pdf]

664 -----

665 Reviewer 2

666

667 General comments:

668 Arctic sea ice is one of the most affected components by climate change.  
669 Understanding its evolution over the last 40 years is key to prepare for further  
670 amplification of Arctic warming. As such, physical variable can be used to examine  
671 the different behaviors of sea ice. The present study addresses the following  
672 question:

673 What insights can be gained about sea ice behavior trends through the application of  
674 clustering techniques? In this work, the authors relied on sea ice concentration (SIC)  
675 seasonal cycle to identify 4 sea ice behaviors instead of the classical approach of  
676 splitting the Arctic based on geographical regions. The study spans from 1979 to  
677 2023, with daily values averaged as 5-day mean and SIC are from passive microwave  
678 satellite observations. The four optimal clusters can change over time and are  
679 identified as: open ocean, permanent sea-ice, partial winter freezing and full winter  
680 freezing. The authors show the long term changes of the 4 types of seasonal cycle of  
681 SIC. They also introduce transitions from one behavior to another, which are either  
682 stabilization (typically any ice regime to open ocean) and destabilization (typically  
683 permanent ice to any winter freezing regime).

684

685 The paper is well structured and clear, which makes it pleasing to read. The context  
686 and method are thoughtfully described. The results are clearly explained, properly  
687 analyzed. Especially the section 3.4.2. which shows a very interesting analysis.

688

689 In my opinion, this is a great paper which could be improved by discussing the  
690 limitations of this study in section 4. Some additions can be added to the text for  
691 clarification.

692

693 Thank you very much. We have added some text in several sections for clarification,  
694 in particular for discussing the limitations of our study.

695

696 In the following pages, I address several points that requires the authors' attention  
697 and I hope they will help improving the present manuscript:

698 The SIC product is presented, yet no limitations nor assumptions made to obtain SIC  
699 are presented. Is there any reason to pick this product compared to another SIC  
700 product? I believe 1-2 sentences of this topic would bring perspective to the text and  
701 remind the reader that this dataset differs from reality. Either in section 2.1  
702 or section 4. Is the product consistent over the 40 years? What is the uncertainty of  
703 the measure?

704

705

706 Thank you. To make the most of our data driven model, we need the largest amount  
707 of data. To the best of our knowledge, there are two satellite data products having  
708 daily SIC starting in 1979: NSIDC and OSI SAF (EUMETSAT). We used NSIDC as it is  
709 commonly used for climate studies while OSI SAF is commonly used for operational  
710 studies.

711

712 We now say in section 2.1: "Measurement uncertainties are highest at low SIC, where  
713 satellite signals are often influenced more by atmospheric and surface  
714 conditions—such as clouds, water vapor, melt on the ice surface, and changes in the  
715 character of the snow and ice surface—than by the actual presence of ice. "

716

717 At several occasions (l.216, l.378, l.422, l.600, l.621, l.658), the authors write 'sea-ice  
718 seasonal cycle'. In my understanding, the seasonal cycle can refer to different  
719 variables such as concentration, thickness, albedo, etc. For sake of clarity, I suggest  
720 either:

721 - add a sentence stating that throughout the manuscript, sea-ice will always relate to  
722 concentration,

723 - add 'concentration' to each instance of term 'seasonal cycle'.

724

725 Thanks. We now say: "In this paper, we determine Arctic regions based on  
726 statistically different sea-ice concentration seasonal cycles, and describe Arctic  
727 changes through the time evolving borders. We identify for the first time  
728 spatio-temporal regions of the Arctic based on the variability of the seasonal cycle of  
729 Arctic sea-ice concentration"

730

731 And in the methodology section 2.1, we now say: "Throughout the manuscript,  
732 sea-ice will always relate to concentration."

733

734

735 The authors uses the clustering analysis to identify sea-ice precursors for one given  
736 point (3.1, L. 325-328). While I find this analysis interesting, I believe using the term  
737 'predictor' is misleading. To my understanding, there is no prediction in this  
738 manuscript; the dataset is entirely based on past data. Therefore, the clustering  
739 outputs do not predict the behavior of sea-ice, but indicate general behavior for a  
740 given grid cell. I do agree that the clustering relies heavily on the start of melting and  
741 freezing periods. Using the term 'indicator' would remove this potential confusing.

742

743 Thank you very much. We agree. We have changed the term predictor to indicator.  
744 Also we substantially pushed further the analysis.

745

746 We now say:

747 "... Therefore, it seems that, for ice-free conditions in summer, the first date of  
748 freezing is a good predictor for the appearance of full ice conditions in the next  
749 winter.

750 However, this suggestion relies solely on the shape of the four types of  
751 seasonal cycles but to properly quantify this, the spread must be taken into account.  
752 Figure S2 displays the spread of the seasonal cycle by plotting the quantiles 0.1, 0.5  
753 and 0.9 of each cluster. To verify our hypothesis on sea-ice predictors, we account for  
754 the spread of the date of retreat and date of advance for each cluster. To do so, we

755 calculate the first date of retreat (the first date after the maximum SIC that is below  
756 0.9) for each seasonal cycle experiencing fully ice covered conditions (having at least  
757 one value above 0.99 during the year). We also calculate the first date of advance  
758 (the first date after the minimum SIC that is above 0.1) for each seasonal cycle  
759 experiencing ice-free conditions (having at least one value below 0.01 during the  
760 year). For these calculations, seasonal cycles have been temporally filtered using a 15  
761 days sliding window in order to get rid of short-term dynamical ice events, as done in  
762 Lebrun et al., (2019). To circumvent the effect of the discontinuity between 31  
763 December and 1 January, we define the origin of time in May for the calculation of  
764 the date of advance. We then label each first date of retreat and first date of advance  
765 for each seasonal cycle with its corresponding cluster according to our clustering  
766 analysis (Figure 4a).

767       The normalized probability over each cluster of the first date of retreat and  
768 first date of advance at each date is shown Figure 5. This figure also displays the total  
769 number of the first date of retreat and the first date of advance of all clusters for each  
770 date. If the first date of retreat occurs between January and April, there is around  
771 95% of chance to belong to either the open-ocean cluster, the partial winter-freezing  
772 cluster or full winter freezing cluster, which all present ice-free duration in the  
773 following summer. However, this situation did not often occur, as the total first date  
774 of retreat happening in this period is unlikely (solely 5% of first date of retreat for all  
775 clusters). The first date of retreat is more likely to occur between the beginning of  
776 April and August, as within this period around 90% of the total date of retreat for all  
777 clusters exist. A first date of retreats in early June has solely around 10% of chance to  
778 belong to the permanent sea-ice cluster which do not present ice-free conditions in  
779 summer while a first date of retreat in early July has around 70% of chance to belong  
780 to the full winter-freezing cluster which shows ice-free conditions in summer.

781       The first date of advance is more likely to occur between the beginning of  
782 August until the beginning of January, as within this period around 90% of the total  
783 date of advance for all clusters exist. A first date of advance in early September has  
784 around 95% of chance to belong to the full winter freezing cluster which present fully  
785 ice covered condition in the following winter, while a first date of advance in early

786 November has around 80% of chance to belong to the partial winter freezing or open  
 787 ocean clusters which do not show fully ice covered conditions in the following winter.  
 788 Therefore, this simple model suggests that the first date of retreat could be a good  
 789 predictor for ice-free conditions the following summer and the first date of advance a  
 790 good predictor for fully ice cover conditions the following winter. “

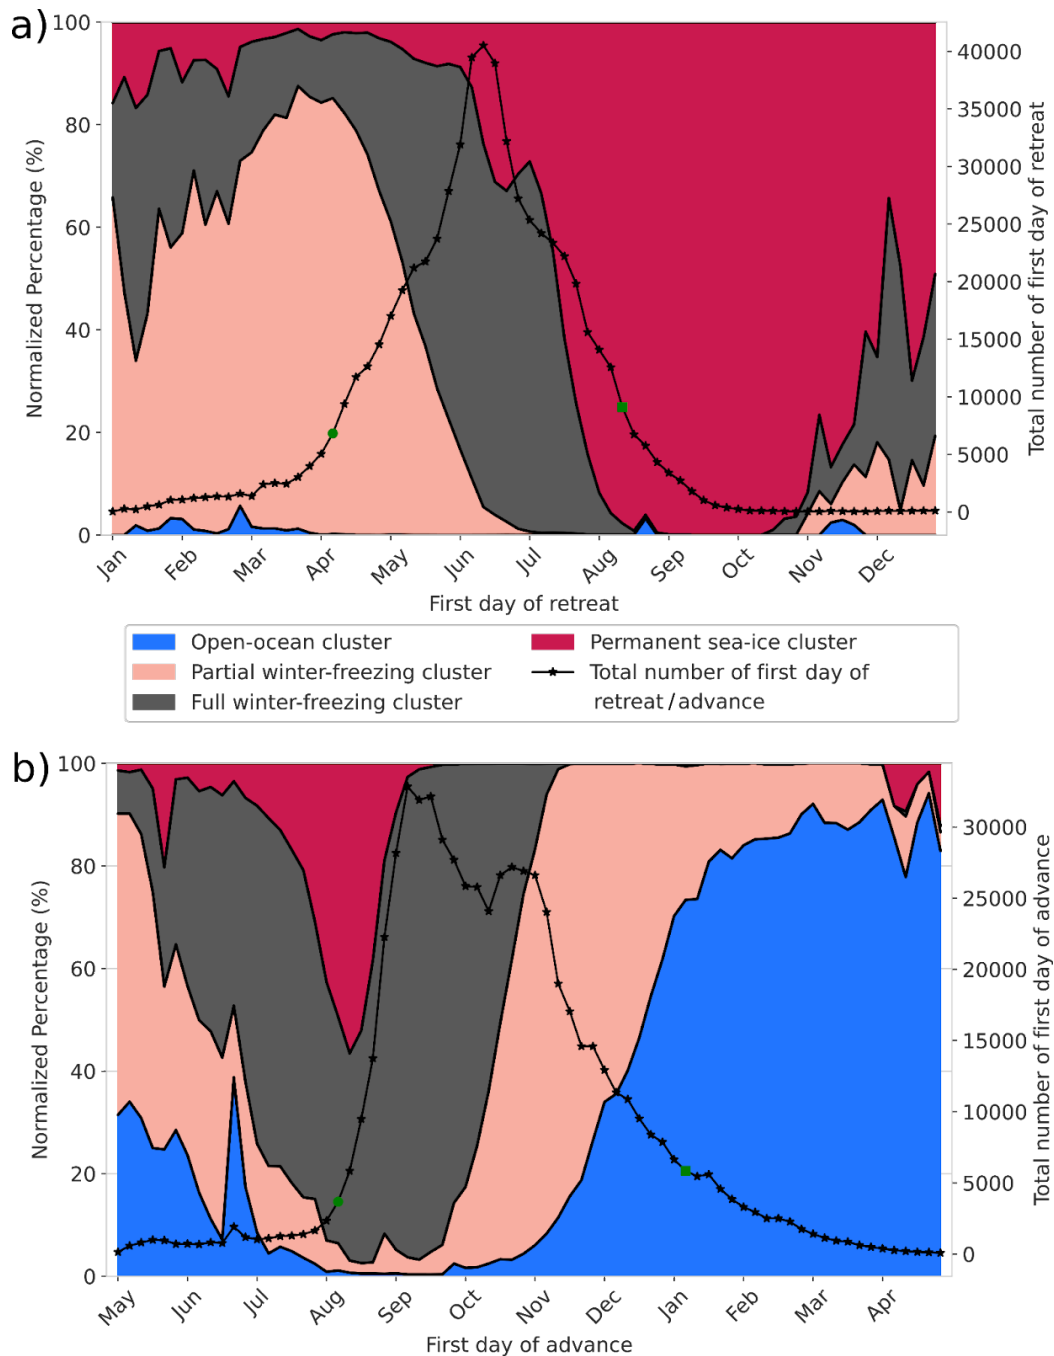

791

792 Figure 5: Normalized probability of the first date of retreat (panel a) and first  
 793 date of advance (panel b) for each cluster. The solid lines with star markers are the  
 794 total number of first dates of retreat and first dates of advance for each date. The

795 green circle markers (start date) and green square markers (end date) cover the  
796 shortest period where around 90% of the first date of retreat, respectively the first  
797 date of advance, for all clusters occurs.”

798 Figure 10 appears before Figure 9 in the text. Figure 9 is actually not cited in the text  
799 directly. I would

800 recommend swapping order of Figure 10 and 9, and adding a citation of former  
801 Figure 9 in the paragraph between l. 554-562, where the “star” and “triangle”  
802 examples are described.

803

804 We have reorganized the figure number and now say:”Figure 10 illustrates how we  
805 define the stabilization and destabilization labels.”

806

807

808 Overall, the section “conclusion and discussion” present the final results and compare  
809 them with the literature. This comparison is satisfactory, however it lacks discussion  
810 on the limitation of this study regarding the data and the method.

811

812

813 Thank you very much. We have added a new paragraph in the discussion . We now  
814 say: ”A limitation of the study is the fact that the method accounts solely for the area  
815 between the centroid and the seasonal cycles to define the clusters, meaning that  
816 there is no constraint to have the same maximum and minimum to belong to one  
817 cluster. However, if the shift of minimum or maximum is large, the area will largely  
818 increase which prevents having a large discrepancy between the maximum and  
819 minimum of the seasonal cycles and their respective centroids. Another limitation of  
820 this study is that sea-ice dynamics are analysed using SIC rather than sea-ice volume  
821 (which would better represent sea-ice behaviour, including growth and melting), due  
822 to the lack of robust and long-term sea-ice thickness data. “

823

824 Need for clarifications:

825 On l.128, the authors state that ‘usual descriptors... do not account/consider for the  
826 full seasonal cycle’ of sea ice. I find this statement unclear (also in the abstract., l.40).  
827 Are the cited studies only considering part of seasonal cycle (by choice, lack of data,  
828 lack of mean) ? Are they using SIC as well or another variable which could be partially  
829 unavailable (such as thickness during melting period) ? Why SIE or type of sea-ice can  
830 not consider the full sea-ice seasonal cycle (also L.131)?

831

832 These studies do not directly consider the full sea-ice concentration seasonal cycle, in  
833 comparison to our study that directly uses the shape of the seasonal cycle in the  
834 calculation to analyze Arctic changes. However, these other methods highlighted  
835 changes in the shape of the sea-ice seasonal cycle, in an indirect way.

836

837 We say: ”These three ways of describing the variations in Arctic SIC (trend of  
838 SIE, sea-ice age, ice-free duration), without considering directly the full sea-ice  
839 seasonal cycle, have nonetheless highlighted changes in the shape of the sea-ice

840 seasonal cycle: (i) the trend in SIE depends on the season, being maximum in late  
841 summer (Fox-Kemper et al., 2021 in IPCC, their Figure 9.13; Meier and Stroeve,  
842 2022), (ii) Arctic sea ice has shifted to younger ice between 1979 and 2018 (IPCC,  
843 2019) and (iii) the trend of later ice advance is expected to eventually double that of  
844 earlier retreat over this century, shifting the ice-free season into autumn (Lebrun et  
845 al., 2019). Here, in this paper, we describe the evolution of the Arctic by delimiting  
846 spatio-temporal regions having a common type of seasonal cycle. “

847

848

849 L. 116: ‘do not consider changes in sea-ice features’. “Features” is used several times  
850 throughout the manuscript (l. 637), and I think concrete examples of features should  
851 be given by the authors at the first reference. By the end of the manuscript, I  
852 understand that such ‘feature’ means the duration of ice season, or duration of open  
853 ocean. At my first reading, it could also have been the sea ice thickness distribution or  
854 other properties of sea ice which are not tackled here.

855

856 We now say: “The major drawback of our approach resides in the exact grid point  
857 quantification of the real seasonal cycle features (such as ice-free duration)”.

858

859

860 L. 317: When writing the dates of melting and freeze up, the authors mention first  
861 the permanent, followed by full winter-freezing and partial winter-freezing. However,  
862 throughout the paragraph, the seasonal cycles are presented in a different order:  
863 open-ocean, partial winter-freezing, full winter-freezing, and permanent ice  
864 clusters.

865 For consistency, I recommend keeping the same order as initially mentioned.

866

867 In the new version, we have removed this paragraph. We now say: “Considering a  
868 given location fully ice-covered in a given winter, our clustering results suggest that  
869 when the sea ice starts to melt in April, the seasonal cycle belongs to the full  
870 winter-freezing cluster and be ice-free the next summer. In contrast, when the  
871 melting starts one month later (in May) the seasonal cycle belongs to the permanent  
872 sea-ice cluster and the considered location will not be ice-free in summer. Besides,  
873 the freezing date for areas free of ice could differentiate between the partial  
874 winter-freezing and full winter freezing clusters and subsequently predict full ice  
875 conditions in the following winter. In our clustering, a freezing starting in October  
876 totally freezes in winter which is not the case if the freezing starts in November,  
877 having a maximum of about 70% SIC in March. Therefore, it seems that, for ice-free  
878 conditions in summer, the first date of advance is a good indicator for full ice  
879 conditions in the next winter. “

880

881 L. 635: “The major limit of our approach”: I find that this major limitation is explained  
882 relatively shortly. In addition, I do not really understand this sentence. Some  
883 rephrasing or additional explanation are necessary. Do you mean to say that a lot of

884 different seasonal cycle of SIC (grid cells) are reduced to one single  
885 seasonal cycle through clustering?

886

887 Yes exactly. We now employ “drawback” instead of “limit” and wrote one specific  
888 paragraph for the limitation of our study.

889

890 We now say: “A limitation of the study is the fact that the method accounts solely for  
891 the area between the centroid and the seasonal cycles to define the clusters, meaning  
892 that there is no constraint to have the same maximum and minimum to belong to one  
893 cluster. However, if the shift of minimum or maximum is large, the area will largely  
894 increase which prevents having a large discrepancy between the maximum and  
895 minimum of the seasonal cycles and their respective centroids. Another limitation of  
896 this study is that sea-ice dynamics are analysed using SIC rather than sea-ice volume  
897 (which would better represent sea-ice behaviour, including growth and melting), due  
898 to the lack of robust and long-term sea-ice thickness data. “

899

900

901 Specific comments:

902 L. 136: citation from Lebrun et al. (2019) is missing.

903 Done.

904 L. 173: “for the first time”. Is this really the first time? This is quite surprising! The  
905 authors did a great job in showing the potential of such a method.

906

907 We do not say that it is the first time that the method is used.

908

909 We say: “In this paper, we identify for the first time spatio-temporal regions of the  
910 Arctic based on the natural variability of the seasonal cycle of Arctic sea-ice.”

911

912 Few sentences are very long: I could suggest rephrasing them: L. 177, l. 301.

913

914 We have shortened L177 and now say: “In section 3, we first analyze the clustering  
915 outputs of the Arctic sea-ice seasonal cycle (3.1), then examine the probability to  
916 belong to each cluster (3.2), and finally investigate the regime stability and transition  
917 (3.3).”

918

919 For L 301, we say: “They exhibit the expected physical behavior that, due to the  
920 thermal inertia of the ice and indirect processes involving the ocean and atmosphere,  
921 the maximum sea-ice coverage (in March) follows the minimum solar insolation by a  
922 lag of around 3 months, and the minimum sea-ice coverage (in September) occurs  
923 around 3 months after the maximum solar insolation (Parkinson et al. 1987). “

924

925 We agree that the sentence is long but we think it is clear enough.

926

927 L. 234: ‘influencing’. As influence could be positive, I had to keep reading that this  
928 influence was undesired, regardless of it being beneficial or not. Maybe use ‘biasing’.

929

930 We choose impacting as different realization gives different results. We now say:  
931 “The initialization of centroids coordinates using k-means++ concept (the first



centroid is chosen randomly, the second is the farthest-away, the third the farthest-away of the first and second, and so on) has been tested and is partly impacting our results."

935

L. 238-239: Quantiles are given both with % (33%, 66%) and as float (0.25, 0.50).

Please, pick one way and stick with it. I would advise for %, as it is used again later in the manuscript.

939

Thank you. We now use the "float" way everywhere in the manuscript.

941

L. 248: At the end of "Mahalanobis distance to constrain the clustering with physical information.", I was expecting to find the definition of Mahalanobis distance which is

L.255. Please, consider putting the definition as soon as possible.

945

Thank you. We now say straight forward that it uses the correlation matrix:" we choose to use the Mahalanobis distance (using the correlation matrix) to constrain the clustering with physical information."

949

950

L. 249: Parenthesis is not closed. "(as shown in Figure 2 by..."

952

Thank you. Done.

954

L. 301: "They exhibit the expected physical behavior that, ...maximum solar insolation (Parkinson et al. 1987)." Although I see what the authors want to express, this sentence appears difficult to read and cumbersome. Please, rephrase and make this sentence lighter.

959

We say:"They exhibit the expected physical behavior that, due to the thermal inertia of the ice and indirect processes involving the ocean and atmosphere, the maximum sea-ice coverage (in March) follows the minimum solar insolation by a lag of around 3 months, and the minimum sea-ice coverage (in September) occurs around 3 months after the maximum solar insolation (Parkinson et al. 1987). "

We agree that the sentence is long but we think it is clear enough.

966

L. 423: "(from no ice to 70% SIC for the partial winter freezing clusters and to 100% SIC for the full winter freezing cluster)". I find this information relevant and I think it would fit better in an addition sentence than in parenthesis.

970

We think parenthesis are a good choice to keep the sentence concise.

972

L. 476: "and to a smaller extent, of the full winter-freezing cluster." What about the decrease in partial winter freezing? It could also be compensated by a gain in full winter-freezing?

976



977 Thank you. We now say:"The pan-Arctic probability to belong to the permanent  
978 sea-ice seasonal cycle has decreased by 3.1 %/decade which is compensated with an  
979 increase of probability to belong to the open-ocean cluster (1.6 % per decade), the  
980 full winter freezing cluster (1.1 % per decade) and the partial winter-freezing cluster  
981 (0.5 % per decade). "

982

983 Figure 8: There are common markers between the subplots. While the open-ocean  
984 category can share the same marker and color, the square and diamond markers  
985 indicate different categories in both subplots. I would recommend changing the  
986 markers in subplot b) to eliminate any possible confusion (especially if  
987 printed in black and white). Additionally, adding a vertical line at the year 2000 can  
988 enhance the graphical readability.

989

990 We think we can easily refer to the legend for the markers of each subplot to not be  
991 confused. Also we have vertical lines every 5 years, which leads to a vertical line for  
992 the year 1999 and 2003. We think adding a line for 2000 will overload the graphic.

993

994 L. 498: ") The area of the MIZ" > "t"

995

996 Done.

997

998 L. 508: It would be interesting to add one sentence about the supposed reason why  
999 the sea-ice loss signature is only visible in the permanent sea-ice cluster. I expected  
1000 to find this in the discussion section but did not see it.

1001

1002 We now use this paragraph to compare our clustering to the MIZ categorization. We  
1003 now say:"Also, looking at the years with marked extremes in September sea ice  
1004 extent, (2007, 2012, 2016 and 2020; see introduction), the MIZ categorization shows  
1005 a transfer of area between the packed ice and the MIZ. In our clustering vision, 2007,  
1006 2012 and 2020 show a transfer of area between the permanent sea-ice cluster and  
1007 full winter-freezing cluster while 2016 show a transfer of area between the full  
1008 winter-freezing and the partial winter freezing, reflecting different dynamical changes  
1009 in the sea-ice seasonal cycles. Therefore, our clustering analysis presents a more  
1010 detailed description of the MIZ category. "

1011

1012 We think further interpretation on why the signature is only seen in the permanent  
1013 sea-ice cluster is out of the scope of this work.

1014

1015

1016 L. 547: "As shown Figure 10" > "in" missing

1017

1018 We now say : "As shown in Figure..."

1019

1020 L. 612: "the area between the Central Arctic and the open-ocean does not" > I  
1021 suggest adding "permanent ice" for clarity. " the area between the permanent ice  
1022 Central Arctic and the open-ocean does not"

1023

1024 We have removed this sentence in the new version.

1025

1026 L.652: "The year of loss in the likelihood to belong to the permanent sea-ice shows" is  
1027 heavy to read for my tastes

1028

1029 We now say:"All these studies are consistent with our results showing a decrease in  
1030 probability for the permanent sea-ice cluster of about 3.1% per decade, especially in  
1031 coastal regions of the Pacific side of the Arctic, leading to a shortening of the  
1032 seasonal cycle. "

1033

1034

1035

1036

1037

1038

1039

1040

1041

1042

1043

1044

1045

1046

1047

1048

1049

1050

1051

1052

1053

1054

1055

1056

1057

1058

1059

1060

1061

1062

1063

1064

1065

1066

1067

1068

1069

1070

1071

1072
