# Supplementary material for: Arctic regional changes revealed by clustering of sea-ice observations
Source: Copernicus journal article supplement (doi:10.5194/egusphere-2025-704), 2025-03-06
Supplement: Supplementary file [file egusphere-2025-704-AC2-supplement.pdf]

# Answers to review

## Arctic regional changes revealed by clustering of sea-ice observations

Amélie Simon<sup>12</sup>, Pierre Tandeo<sup>13</sup>, Florian Sévellec<sup>23</sup>,  
Camille Lique<sup>2</sup>

<sup>1</sup> IMT Atlantique, Lab-STICC, UMR CNRS 6285, 29238, Brest,  
France

<sup>2</sup> Univ Brest CNRS Ifremer IRD, Laboratoire d'Océanographie  
Physique et Spatiale (LOPS), Brest, France

<sup>3</sup> ODYSSEY Team-Project, INRIA CNRS, Brest, France

## 33 **Reviewer 1**

34

35 This review is co-signed by François Massonnet and Noé Pirlet (UCLouvain)

36

### 37 **Summary.**

38

39 The authors use an unsupervised machine learning method, namely k-means, to  
40 identify regimes of Arctic sea ice concentration (SIC) variability based on the seasonal  
41 cycle. They use Mahalanobis distances instead of classical Euclidean distance, to  
42 account for the correlation between the months, and the initialization based on equal  
43 separation of quantiles for the centroids, to avoid random aspects in the clustering  
44 algorithm. They report the mean state and variability / trends of the sea ice state  
45 when categorized with this approach.

46

### 47 **Novelty.**

48 The work provides interesting insights on the dynamics of Arctic sea ice and is a good  
49 topic for a journal like The Cryosphere.

50

### 51 **Positioning.**

52 There have been early studies of clustering that are not cited, namely  
53 Fuckar et al. (2016) and Lukovich and Barber (2007). The authors should also cite  
54 Raphael and Hobbs (2016), since it is an (Antarctic) study that defined regions based  
55 on the behavior of sea ice concentration.

56

57 Thank you very much for these very interesting and relevant articles.

58

59 We have now added in the introduction:

60 "Using an ocean-sea ice general circulation model, Fuckar et al. (2016) performed a  
61 k-means cluster analysis on pan-Arctic detrended sea-ice thickness and found that  
62 the associated binary time series of cluster occurrences exhibit predominant  
63 interannual persistence with mean timescale of about 2 years."

64

65 "A statistical regionalization method based on observed SIC has been proposed for  
66 Antarctica. Raphael and Hobbs, (2014) isolates regions around Antarctica by using  
67 sea ice extent decorrelation length scale and variance. The resulting five sectors  
68 exhibit distinct times of sea-ice advance and retreat. Their methodology does not  
69 account for the temporal evolution of the sectors."

70

71 And in the discussion:

72 "Besides, by the use of the Silhouette coefficient, we found the Arctic is best  
73 described with a number of clusters of 3 (the open-ocean has been added afterward).  
74 This number has also been found by Fuckar et al., (2016) using a suite of indices  
75 (Krzanowski-Lai, Calinski-Harabasz, Duda-Hart J index, Ratkowsky-Lance, Ball-Hall,  
76 point-biserial, gap statistic, McClain-Rao, tau and scatter-distance index) onto  
77 detrended sea-ice thickness of an ocean-sea ice general circulation model."

78

79

80

81 “In contrast with Fuckar et al., (2016) that calculated time series of occurrences of  
82 clusters based on the resemblance of the pan-Arctic pattern, our probabilistic method  
83 defines a time series of probability of occurrence of each cluster at the grid cell scale.  
84 This enables us to study the spatial evolution of the cluster areas, and therefore  
85 define spatio-temporal regions that share a common feature (in our case sea-ice  
86 seasonal cycle).”

87  
88 “Also, Lukovich and Barber (2007) examination of spatial coherence in SIC anomalies  
89 indicates that maximum SIC anomalies prevail near the Kara Sea, Beaufort Sea, and  
90 Chukchi Sea regions during late summer/early fall from 1979 to 2004. All these  
91 studies are consistent with our results showing a decrease in probability for the  
92 permanent sea-ice cluster of about 3.1% per decade, ...”

93

94

### 95 **Methodological questions**

96 Currently our main obstacle to understanding the research is methodological. Our  
97 impression is that the manuscript would deserve to have a better description of the  
98 details of the methods of clustering, because as such, we would feel unable to  
99 reproduce the results due to many missing details. Since we are unsure about several  
100 methodological aspects, we do not comment much on the science itself yet – maybe  
101 at the next iteration of the review. Below, we identify several places where we think  
102 an improvement could be made.

103

104 • L. 224: if we understand correctly, there are as many such matrices of size 73 by 1  
105 123 710, as there are years (45), is that correct? So the k-means clustering is  
106 applied on all years individually, which allows producing time series. We think it  
107 would be good to mention that already here.

108

109 The 123710 includes all the seasonal cycles for all grid cells and all years within the  
110 same matrix. We reformulate to be clearer: “The input data of our clustering are all  
111 the seasonal cycles including every considered grid cell and every year.”

112

113 To help the reader, we have also produced a schematic of the input data for the  
114 clustering Figure 2a.

115

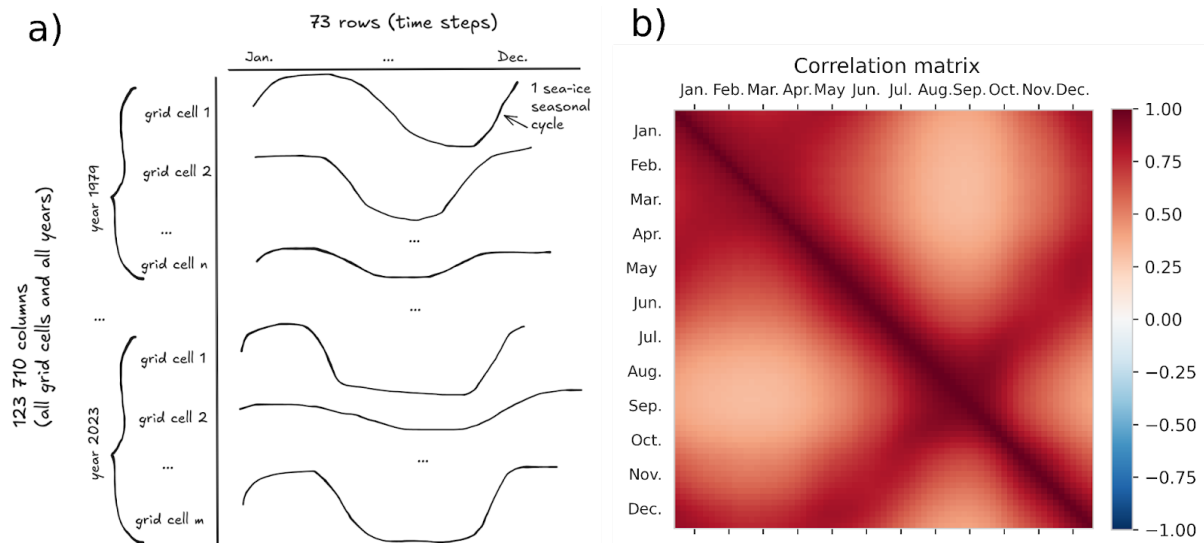

116

117 Figure 2: Schematic of the matrix input data for the k-means clustering (panel a) and  
 118 correlation matrix of the 5-day mean sea-ice concentration for all non-zero sea-ice  
 119 seasonal cycle above 55°N (panel b)

120

121 • L. 229: “It is an iterative method that minimizes a cost function being the sum of  
 122 the squared distance between each seasonal cycle and its nearest cluster center  
 123 (also called centroid)”. Here, it would be useful to write (“in a sense to be defined  
 124 later”) after “distance” because it took us some time to understand how a 73-  
 125 time frame seasonal cycle could be located in the state space. Also, it could be  
 126 mentioned here that at each iteration, the coordinates of the clusters are updated.

127

128 We now say: “It is an iterative method that minimizes a cost function being the sum  
 129 of the squared distance (distance in a sense that would be defined later) between  
 130 each seasonal cycle and its nearest cluster center (also called centroid). At each  
 131 iteration, the coordinates of the centroids are updated.

132

133 • L. 225-229. We feel that a methodological figure could help here, showing how  
 134 the SIC fields are arranged in a matrix, how this matrix represents a series of  
 135 points in a 73-dimensional space (you can work in 2-D for illustrations), and how  
 136 the centroids evolve at each iteration, before a remapping is done in physical  
 137 space. The Cryosphere is a journal where methods from data science can appear  
 138 new to some readers.

139

140 To help the reader, we have also produced a schematic of the input data for the  
 141 clustering Figure 2, panel a.

142

143 We also now provide the first centroids for the clustering involving 2 to 4 clusters  
 144 Figure 3, panel b.

145

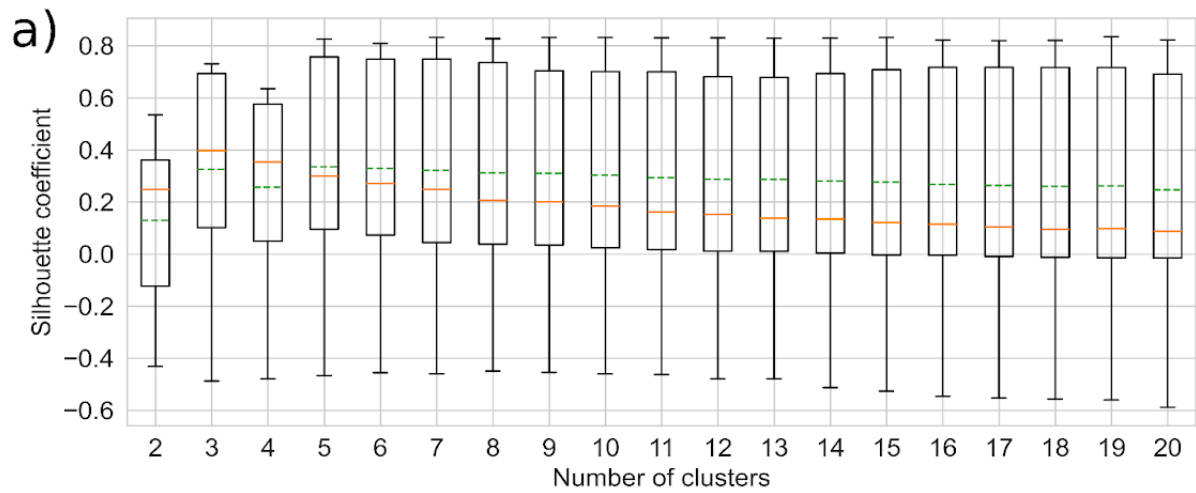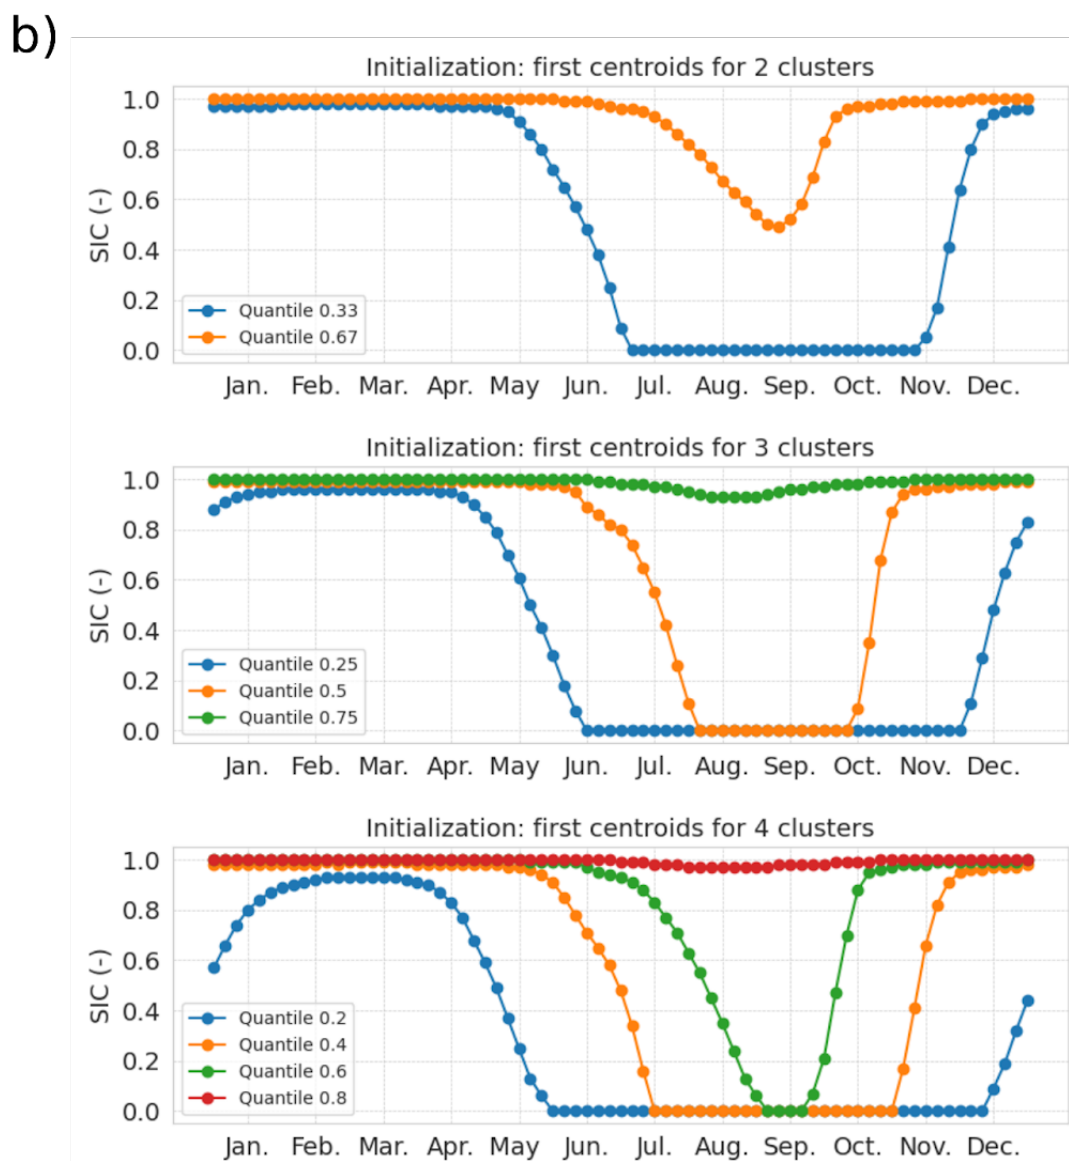

146

147 Figure 3: Boxplot of the Silhouette coefficient for a number of clusters from 2 to 20.  
148 The box extends from the first quartile (0.25) to the third quartile (0.75) of the

149 Silhouette coefficient. The whiskers indicate the 1st and 99th percentiles. The  
150 green-dashed and orange-solid lines indicate the mean and median values,  
151 respectively (panel a). Equal quantile separation initialization: centroids of the first  
152 iteration of the clustering for a number of cluster of 2, 3 and 4 (panel b)

153

154 • L. 234-236. Has the method of equal quantile separation been tested elsewhere  
155 (if so, please cite a relevant study) or is it something that the authors are  
156 proposing in this study?

157

158 We found a reference on that matter (see e.g. Jambudi and Gandhi, 2022). We now  
159 say: "The strategy of initialization based on quantiles has been investigated for  
160 synthetic and real dataset and has shown a faster convergence compared to Random  
161 and Kmeans++ initialization techniques (Jambudi and Gandhi, 2022). "

162

163

164 Jambudi T, Gandhi S (2022) An Effective Initialization Method Based on Quartiles for  
165 the K-means Algorithm. Indian Journal of Science and Technology 15(35):  
166 1712-1721.

167 <https://doi.org/10.17485/IJST/v15i35.714>

168

169 • L. 234-236. It is not entirely clear how quantiles are calculated on data that has  
170 73 dimensions (and what "quantile separation", line 235, really means)? We  
171 understand that it is possible to compute the distance between any two pairs of  
172 points by applying the Mahanabis distance on the two 73-long vectors; do the  
173 authors then sort all mutual distances and define the quantiles based on that? If  
174 so, how do they revert to one centroid given that the distance involves two  
175 points? This method is not described in a way that would allow reproducing the  
176 results. Please clarify this part.

177

178 The quantile is solely for the initialization of the centroid's coordinates and is  
179 classically computed without using Mahalanobis distance. Instead of initializing  
180 randomly the first coordinates of the centroids, we fix it to be the quantiles. The next  
181 iteration does not account for quantiles.

182

183 We have added Figure 3, panel b to make it more clear.

184

185

186 • L. 246-260. It is not entirely clear how the correlations of Fig. 2 are calculated. If  
187 we consider, for example, the entry that connects the first 5 days of February and  
188 the first 5 days of June, then what exactly is calculated? Do the authors first  
189 average SIC in space and then compute correlation over all pairs of these  
190 averages on the 45 years? Do the authors compute correlation over space (in that  
191 case, do they stack the 45 years on each other, effectively producing two vectors  
192 of 45 times 1 123 710 length? Also isn't there an issue with using correlation here,  
193 since most points are either at 0 or at 1 ? A scatter plot would reveal something

194 very different from what a correlation aims to capture from a standard cloud of points.  
 195 Can the authors elaborate a bit on these two points? Could the authors  
 196 show the histograms of SIC > 55°N for the 15th of each month, for example?

197

198 Thank you. We correlate the matrix of Figure 2, meaning we do not average anything,  
 199 we directly correlate all non-zero seasonal cycles in time and space.

200

201 We have now more explicitly explained the calculation: “The correlation matrix is  
 202 computed for all nonzero seasonal cycles for the period 1979-2023 above 55 °N. It is  
 203 calculated from the matrix of shape (73, 1123710), having 1123710 value of SIC for  
 204 73 dates.”

205

206 As suggested, we have plotted the histogram of SIC for the 15th of each month that  
 207 even if it shows a lot of 0 and 1, shows some nuances. Even if not ideal, we think that  
 208 the correlation is acceptable.

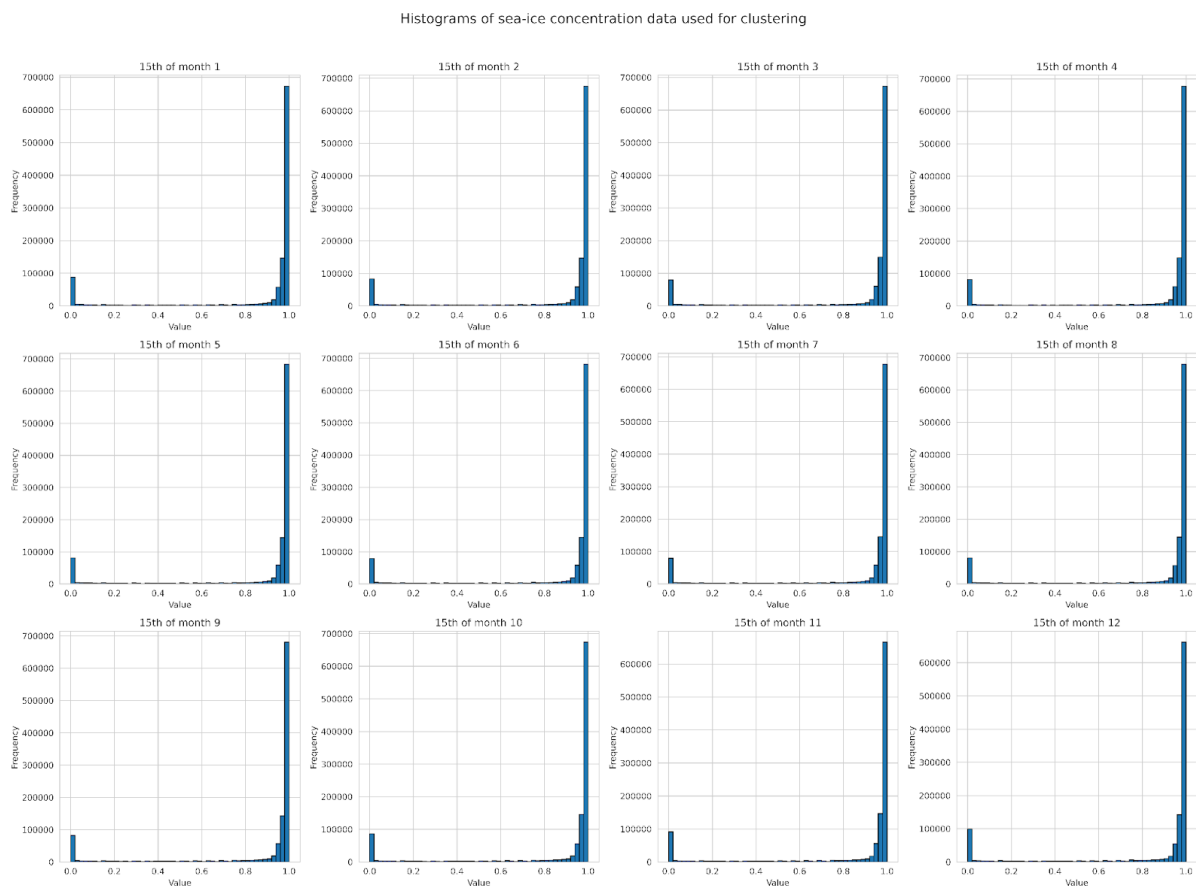

209

210

211 • Fig. 2: the Figure caption is too short, but instead should allow reproducing the  
 212 figure unambiguously.

213

214 We now say in the caption of Figure 2: “Correlation matrix of the 5-day mean sea-ice  
 215 concentration for all non-zero sea-ice seasonal cycle above 55°N”

216

217

218 • L. 246-260. These correlations are computed without deseasonalizing nor

219 detrending the data, is that correct? When one applies other data reduction  
220 methods like PCA/EOFs, the forced variability is removed first – is it the case  
221 Here?

222

223 The concept is different from PCA/EOF technique, as we do not work with time  
224 series but with seasonal cycles. Also, usually the PCA/EOF are used to assess mode  
225 of variability, so trends are removed. Here we want to describe the trend, but through  
226 changes in regions having typical seasonal cycles. The two approaches are therefore  
227 different. In our case, we don't detrend the data.

228

229 • L. 264: what does “normalizing by the correlation matrix” mean here? Divide  
230 entry-wise by each element? If multiplying by the inverse of this matrix, then use  
231 this phrase – one cannot “divide” by a matrix. Also in L. 256 we read “normalized  
232 by the inverse of the correlation matrix” while L. 264 “we read “normalized by the  
233 correlation matrix”. Could the authors clarify this?

234

235 Thank you. We now say: “ we do not normalize the distance by the inverse of the  
236 covariance matrix (as usually done for the Mahalanobis distance) but by the inverse of  
237 the correlation matrix”

238

239 • L. 373: please explain how  $M_{cor}$  is constructed (related to our other comment  
240 on the corresponding figure).

241

242  $M_{cor}$  is the correlation matrix calculated from all seasonal cycles (all years and all  
243 grid points). We now say: “The correlation matrix is computed for all nonzero  
244 seasonal cycles for the period 1979-2023 above 55 °N. It is calculated from the  
245 matrix of shape (73, 1123710), having 1123710 value of SIC for 73 dates”.

246

247 We have modified this part, as we no longer used the Mahalanobis for the calculation  
248 of probability. We use the Euclidean distance for that. We still use the Mahalanobis  
249 for the clustering though. We now say: “The Mahalanobis norm, deriving from a  
250 symmetric operator, effectively rotates the original physical phase space (here., date  
251 of the annual cycle) to align with the data's natural directions—linear combinations of  
252 the physical time axis. This transformation allows centroid detection in a space that  
253 reflects the intrinsic structure of the data. Therefore, using the Mahalanobis distance  
254 helps the clustering algorithm to follow the direction of the correlation and capture  
255 the elongated shapes of clusters. When calculating the probability to belong to one  
256 cluster, we do not need to work with the data's natural directions, but rather work in  
257 the original physical time space. Therefore we use Euclidean distance for the  
258 calculation of probability and the Mahalanobis for the clustering.”

259

260 • L. 379-382: So there the authors used fuzzy k-means but then in the previous  
261 section, it was not fuzzy ? This is not very clear, and calls for a better justification  
262 of the transition between these two sections. Also, is there an objective criterion  
263 to prefer fuzzy k-means over crisp assignments? In general, how do we measure  
264 whether the k-means did a good job or not (is it with the Silhouette metric, and if  
265 so, what is a “good” clustering)?

266



267 We now say: “This means that we use a “fuzzy” k-means clustering where the  
268 assignment is soft (each data point can be a member of multiple clusters) in contrast  
269 to a hard or crisp assignment (each data point is assigned to a single cluster; Jain et  
270 al., 2010).”

271

## 272 **Presentation**

273 • L. 73 : We think « sea-ice » with a dash should be used when it is used as an  
274 adjective; when used as a noun, it should be « sea ice »

275

276 Thank you. We have modified accordingly.

277

278 • L. 140-157: on the regionalization: it is not entirely clear why this paragraph is  
279 here. As we understand, no regionalization is required since the k-means method  
280 picks the optimal clusters which can then be used to defined physically-relevant  
281 regions. We would propose to move this paragraph to the discussion, since the  
282 regionalization is more an outcome of the work than a pre-requisite.

283

284 We have made it more clear that we have a double objective: “We determine Arctic  
285 regions based on statistically different sea-ice seasonal cycles, and describe Arctic  
286 changes through the time evolving borders of the regions characterized by these  
287 seasonal cycles.”

288

289 • L. 158-172: the emphasis on regionalization for this paragraph (which follows  
290 another paragraph on regionalization) shifts somewhat the research question  
291 from the initial goal (understanding the physical regimes) to another goal  
292 (defining objective geographic boundaries). We would propose to focus the work  
293 on the former, and to discuss later in the text how the k-means can also be seen  
294 as a way to provide physically-based regions based on distinct sea ice dynamics.  
295 Of course, identifying spatial clusters and delimiting regions are two tasks that go  
296 hand in hand, but to us the main research question is not always clear.

297

298 We have made it more clear that we have a double objective: “we determine Arctic  
299 regions based on statistically different sea-ice seasonal cycles, and describe Arctic  
300 changes through the time evolving borders.”

301

302 • L. 200 to 202: If 5-day mean shows similar results than for 1 day why not keeping  
303 1 day as temporal resolution ? Could the authors precise their reasons for using  
304 5-day mean instead of 1 day?

305

306 As the computation is quite long, we keep it to 5-days, as it gives similar results as  
307 daily data. We have added the following figure in the supplementary to demonstrate  
308 this.

309

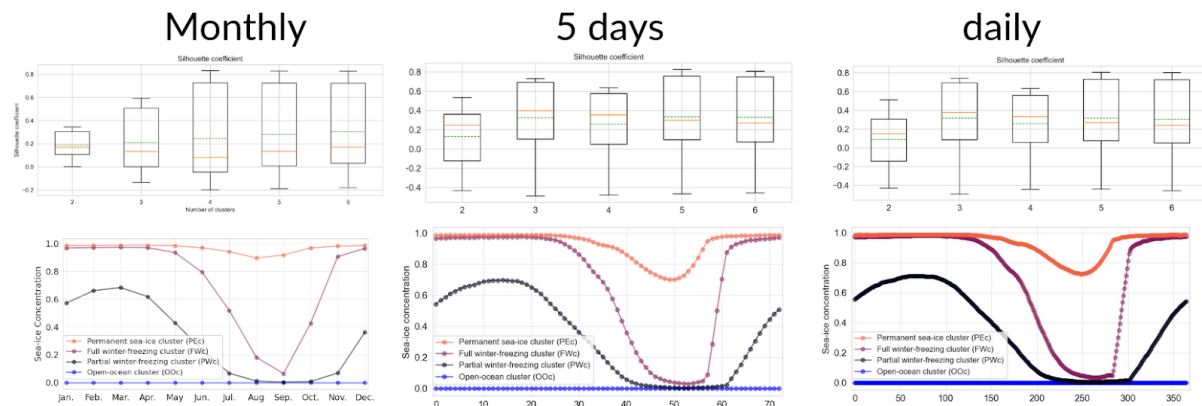

310

311 Figure S1: Comparison between monthly (left), 5-day (middle) and daily temporal  
 312 resolution (right). The Silhouette coefficient for a number of clusters from 2 to 6 (top  
 313 row), the four types of seasonal cycles (middle row) and a map of the four labels  
 314 (stable, stabilization, unstable, and destabilization) used to describe the evolution of  
 315 Arctic clusters based on sea-ice seasonal cycles (bottom row). In the top row, the box  
 316 extends from the first quartile (0.25) to the third quartile (0.75) of the Silhouette  
 317 coefficient. The whiskers indicate the 1st and 99th percentiles. The green-dashed and  
 318 orange-solid lines indicate the mean and median values, respectively.

319 • Fig. 9 is never cited

320 Fig 9 is now Fig 10. We now say: "Figure 10 illustrates how we define the  
 321 stabilization and destabilization labels."

322 • On printed sheets of paper, the figures do not render very well.

323 We have improved the quality (by using eps instead of png in inkscape).

324

325 • Line 358 to 359. The transition from the section 3.1 to 3.2 is quite enigmatic.

326 Section 3.1 seems to deal with deterministic clustering where each point is  
 327 assigned to a cluster while section 3.2 deals with probabilistic clustering. We  
 328 would propose to put the explanation of lines 362-363 at the end of the section  
 329 3.1 to make a smoother transition

330

331 As suggested, we introduced a smoother transition for the sections by naming the  
 332 reason for introducing the probabilities: "As a given seasonal cycle can be in between  
 333 two or more seasonal cycle centroids, we introduce the probability to belong to one  
 334 cluster in the next section."

335

336 • Line 392: Could the authors explain why they chose to divide the period into 3  
 337 sub-periods of 15 years ? It seems a bit arbitrary and it's hard to understand  
 338 where the authors are going with this sub-time division. Could the authors add a  
 339 bit of context to introduce that choice?

340

341 We have 45 years of data. 45 is divided by 15 and 3 rows are a good compromise for  
 342 the size of the figures.

343

344 • Line 456 to 459 : We find it unclear whether the probabilities of belonging to a

cluster given in this paragraph are the average of the probabilities over all the years or just one year? Looking at Figure 7, it seems that this is for 1979. If that's the case, why take one year rather than the average? Could the authors clarify This?

Good point, we have now calculated the average and say: "The probability of belonging to the open-ocean cluster is around 40%, to the permanent sea-ice cluster is around 29% and to the full winter-freezing cluster is around 18 % and to the partial winter-freezing cluster is around 13% (Figure 7)."

• Line 511. We are unsure about what the authors are trying to imply/measure by defining "stable", "stabilization", "unstable" or "destabilization" regimes. In particular, they should relate those regimes to something known from the literature or give more interpretation because this notion and its application come somewhat out of the blue.

We propose these new regimes to quantify the stability and transition of the Arctic sea-ice seasonal cycles and refine the description in several parts of the text.

Minor comments

• L. 43 « optimal » should be accompanied by « (in the sense of statistical dissimilarity) » or something like that, because otherwise this word can be wrongly interpreted.

We now say: "Without providing prior information, this data-driven method shows that the Arctic is best described by four types of seasonal cycles ..."

• L. 45. The use of the phrase "ice-free conditions" should be taken with care here and throughout the manuscript, since ice-free has a well-defined meaning in the climate projection literature (namely, sea ice extent < 1 million km<sup>2</sup>). What exactly is ice-free in the context of this study? We also propose to add a horizontal line on Fig. 4a to represent the chosen threshold, in order to quickly see when the seasonal cycle shows ice-free conditions.

Thank you. We now clearly define that in this study ice-free conditions occur when SIC < 0.15. To not overload the Figure 4a, we say it in the abstract : "two clusters showing ice-free conditions (SIC < 0.15)"

and in the main text : "We refer to ice-free conditions when SIC is below 0.15."

• L. 43-45: When reading this part of the abstract, it sounds like the authors are re-discovering two regimes that are well-known (open-ocean and permanent ice) and two intermediate regimes where ice is present seasonally. Since the work goes deeper than re-inventing these regimes, we would propose to describe the clusters with more physical interpretation and to highlight what the k-means analyses have allowed to do, that the human eye is not able to see (i.e., what is the added value of an algorithm that can deal with large amounts of data in a high

393 dimension space)

394

395 Thank you. We now say: "Without providing prior information, this data-driven  
396 method shows that the Arctic is best described by four types of seasonal cycles: ..."

397

398

399 • L. 50 likelihood reduction à likely reduction? Or do the authors mean that the  
400 likelihood of this regime in the Canadian side has reduced? Maybe likelihood  
401 should be changed by "probability of occurrence" to make things clearer?

402

403 We now say: "The pan-Arctic probability to belong to the permanent sea-ice seasonal  
404 cycle has decreased by 3.1 %/decade which is compensated with an increase of  
405 probability to belong to the open-ocean cluster (1.6 % per decade), the full winter  
406 freezing cluster (1.1 % per decade) and to a smaller extent to the partial  
407 winter-freezing cluster (0.5 % per decade)"

408

409 • L. 52. You mean that spatial redistributions occur within the four clusters ?

410

411 Yes, exactly. We now say "spatial redistributions"

412

413 • L. 53-55 : it is grammatically strange to write that a "sea" is stabilizing. It is the  
414 state characterized by a given cluster that becomes less frequent, in a given  
415 region/sea.

416

417 We explicit what that means by saying: "From the Beaufort to the Kara Seas, the  
418 southern parts have stabilized (experiencing a new typical seasonal cycle,  
419 corresponding to the full winter-freezing cluster) and the northern part have  
420 destabilized (losing their typical permanent sea-ice seasonal cycle)."

421

422 • L. 54-55: be consistent grammatically: « have destabilized » ... « have  
423 stabilized »...?

424

425 Thank you. We have modified it.

426

427 • L. 113 : % relative to what ?

428

429 It is relative to the period 1979 to 2018. We say: "the September SIE exhibits a  
430 decreasing trend of  $-12.8 \pm 2.3\%$  per decade over the period 1979 to 2018".

431

432 • L. 116 : maybe « and do not consider changes in the underlying processes" ?

433

434 We want to emphasize that, on top of analyzing if there is sea-ice or not, changes can  
435 be made within the sea-ice regime. We say: "However, trends of SIA or SIE only  
436 inform about changes in regime from ice to open-ocean and do not consider changes  
437 in sea-ice features."

438

439 • L. 125: it would be worth mentioning that these studies have highlighted an  
440 asymmetry in the trend of retreat vs advance (see Lebrun et al. In particular).

441 Indeed, the current manuscript also reveals an asymmetry in the seasonal cycle,  
442 so there is a nice connection to be made here.

443

444 Exactly. We say that in the following paragraph: "(iii) the trend of later ice advance is  
445 expected to eventually double that of earlier retreat over this century, shifting the  
446 ice-free season into autumn (Lebrun et al., 2019)"

447

448 • L. 128 it is true that these studies do not inform on the sea ice dynamics including  
449 melt and growth behaviours, but does the present study do so, given that it does  
450 not seek to study the mass balance terms nor the time derivatives of sea ice  
451 Concentration?

452

453 The melt and growing behaviors are taken into account in our analysis through  
454 diagnostics of three different shapes of sea-ice. It includes the time derivative of SIC.  
455 But we agree that dynamics could not be fully accounted for without considering the  
456 thickness.

457

458 We add in the limitation: "Another limitation of this study is that sea-ice dynamics are  
459 analysed using sea-ice concentration, rather than sea-ice volume (which would better  
460 represent sea-ice behaviour, including growth and melting), due to the lack of robust  
461 and long-term sea-ice thickness data."

462

463

464 • L. 131-132. The statement that previous studies have not directly considered the  
465 full sea ice seasonal cycle, is not entirely correct. For example, previous studies  
466 looking at SIE report the seasonality of trends, of the mean state, of the variability.  
467 But they consider each point of the season separately, while in the present study  
468 the seasonality is accounted implicitly for while producing the clusters, through  
469 the correlation matrix.

470

471 Yes, previous studies have reported the seasonality of trends, which we state in the  
472 same sentence by saying: "These three ways of describing the variations in Arctic SIC  
473 (trend of SIE, type of sea-ice, ice-free duration), without considering directly the full  
474 sea-ice seasonal cycle, have nonetheless highlighted changes in the shape of the  
475 sea-ice seasonal cycle: (i) the trend in SIE depends on the season...". However, we  
476 think that these studies have not accounted directly for the full seasonal cycle in the  
477 diagnostics.

478 We also add in the limitation: "The major drawback of our approach resides in the  
479 exact grid point quantification of the real seasonal cycle features, as we gather grid  
480 cells within a type represented by a single seasonal cycle (the centroid). However,  
481 considering the full seasonal cycle gives useful information, as its derivative gives the  
482 period of melting and growth. Therefore, the two diagnostics complement each other  
483 nicely."

484

485 • L. 216 a "non-zero" seasonal cycle could be interpreted differently by different  
486 readers. We assume you mean "having at least a non-zero value for SIC  
487 throughout the year" ?

488

489 We now say: “We consider all oceanic grid cells above 55°N having a non-zero  
490 sea-ice seasonal cycle (having at least a non-zero value for SIC throughout the year)”  
491

492 • Line 298: “one of the two outputs” leads the reader to wonder what the other  
493 output might be, and it is not displayed in the same paragraph. It is only  
494 introduced at line 347. Please mention that the other output (the connection of  
495 each grid point to a cluster) is studied later.

496

497 We have reorganized this paragraph to introduce directly the two outputs. We now  
498 say: “The clustering method connects each seasonal cycle to a given cluster (Figure  
499 4a) and provides the centroids of each cluster (Figure 4b).”

500

501 • L. 302: follows à lags?

502

503 Yes, we now say: “follows the minimum solar insolation by a lag of around 3 months”

504

505 • L. 339 : apparition à appearance ?

506 We have corrected it. Thank you.

507

508 • Fig. 4 : the caption is not sufficient to understand what is plotted. Panel (a) shows  
509 the average concentration over each cluster, is that correct? How is the time  
510 dimension dealt with here? Are the average SIC determined for each cluster, then  
511 averaged in time?

512

513 Panel a shows the centroid of the clustering method. These centroids are seasonal  
514 cycles. It is the output of the clustering method.

515

516 We now say in the caption: “Four types of seasonal cycles (output of the clustering  
517 method, called centroids)”

518

519 • Fig. 4b. have the authors plotted these maps for iconic years like 2007 (big ice  
520 arch between the Greenland and the Kara Sea or 2012 (absolute minimum)? That  
521 would be interesting to see to what extent the method captures the physics of  
522 those events.

523

524 We now comment on these two years as follows: “ Also, looking at the years with  
525 marked extremes in September sea ice extent, (2007, 2012, 2016 and 2020; see  
526 introduction), the MIZ categorization shows a transfer of area between the packed  
527 ice and the MIZ. In our clustering vision, 2007, 2012 and 2020 show a transfer of  
528 area between the permanent sea-ice cluster and full winter-freezing cluster while  
529 2016 show a transfer of area between the full winter-freezing and the partial winter  
530 freezing, reflecting different dynamical changes in the sea-ice seasonal cycles.  
531 Therefore, our clustering analysis presents a more detailed description of the MIZ  
532 category. “

533

534 • Line 370 centroids à centroid

535

536 We have corrected it. Thank you.



537

538 • Fig. 5: From a quick look, one could argue that the method is not really able to  
539 sort the data, as all four clusters have ~25% probability near the ice edge. We  
540 were both surprised to see so little variability in the maps, as they seem to have  
541 quite homogenous spatial distributions of probabilities.

542

543 Thank you very much. We have now decided to calculate the probability using the  
544 euclidean distance, which better splits the regions (we still use mahalanobis for the  
545 clustering).

546

547 We now say: “The Mahalanobis norm, deriving from a symmetric operator, effectively  
548 rotates the original physical phase space (here, date of the annual cycle) to align with  
549 the data's natural directions—linear combinations of the physical time axis. This  
550 transformation allows centroid detection in a space that reflects the intrinsic  
551 structure of the data. Therefore, using the Mahalanobis distance helps the clustering  
552 algorithm to follow the direction of the correlation and capture the elongated shapes  
553 of clusters. When calculating the probability to belong to one cluster, we do not need  
554 to work with the data's natural directions, but rather work in the original physical  
555 time space. Therefore we use Euclidean distance for the calculation of probability and  
556 the Mahalanobis for the clustering.”

557

558 The new Figure

559

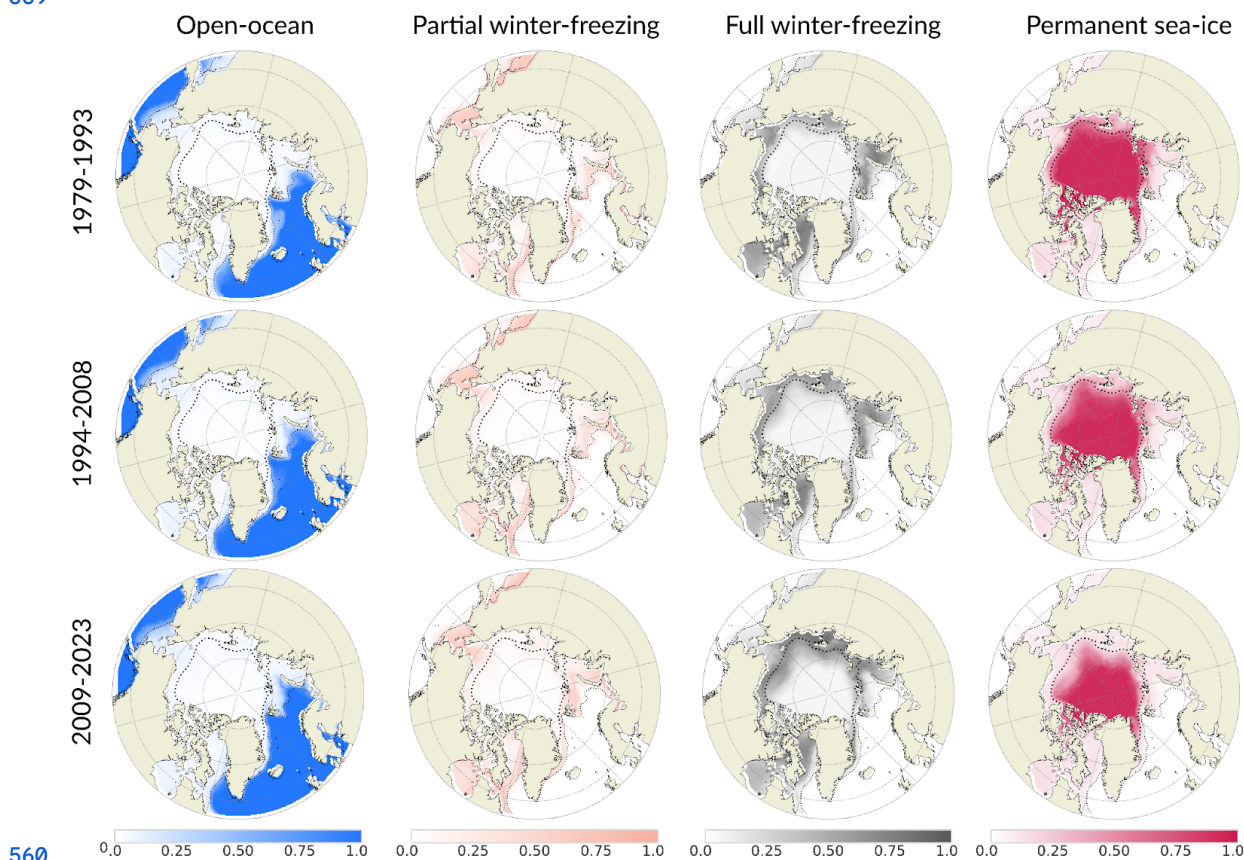

560

Figure 8: Map of the probability of each cluster: open-ocean (first column), partial winter-freezing (second column), full winter-freezing (third column) and permanent sea-ice (fourth column). Rows correspond to three periods of 15 years: 1979-1993 (top row), 1994-2008 (middle row) and 2009-2023 (bottom row). The dotted thin and thick lines are the mean SIC of 0.15 and 0.8 for the period 1979-2023, respectively. The circle sitting over the north pole is the pole hole (see section 2.1).

567

• Fig. 7. How is the “total probability” calculated here? Each spatial point has been assigned a probability, are these probabilities then averaged in space? Does it make physical sense to average probabilities in space?

571

572

The total probability is calculated by assigning to each spatial point, four probabilities (one for each cluster) and then summing for each cluster its associated probability over the whole domain. We do not average in space, we sum.

576

We say:” We call the total probability,  $P_t$ , the normalized area weighted probability over all grid cells. We sum, for each year, the probability weighted by the area of each grid cell over all grid cells divided by the sum of the probability weighted by the area of each grid cell over all clusters and all grid cells.

581

• Fig. 8: y-label units should be  $m^2$  not  $km^2$

583

Thank you very much. We have corrected it.

585

• Fig. 8: please repeat in the caption how Open-ocean, MIZ and Packed ice are Defined.

588

Good idea. For clarity, we now say in the caption: ”Figure 8: (a) Time series of the total area covered by each of the four clusters. (b) Times series of the area covered by three categories: packed ice ( $0.8 < SIC < 1$ ), the Marginal Ice Zone (MIZ;  $0.15 < SIC < 0.8$ ) and the open-ocean ( $SIC < 0.15$ ).

593

• Fig. 8: how do we explain that there is much less interannual variability in the (b) panel (that is, hand-made clustering) compared to (a) (k-means)?

596

Thank you so much. Thanks to your comment we have noticed a bug when plotting the old Figure 8b. We have corrected it and the new figure has a similar interannual variability for panel a and b.

600



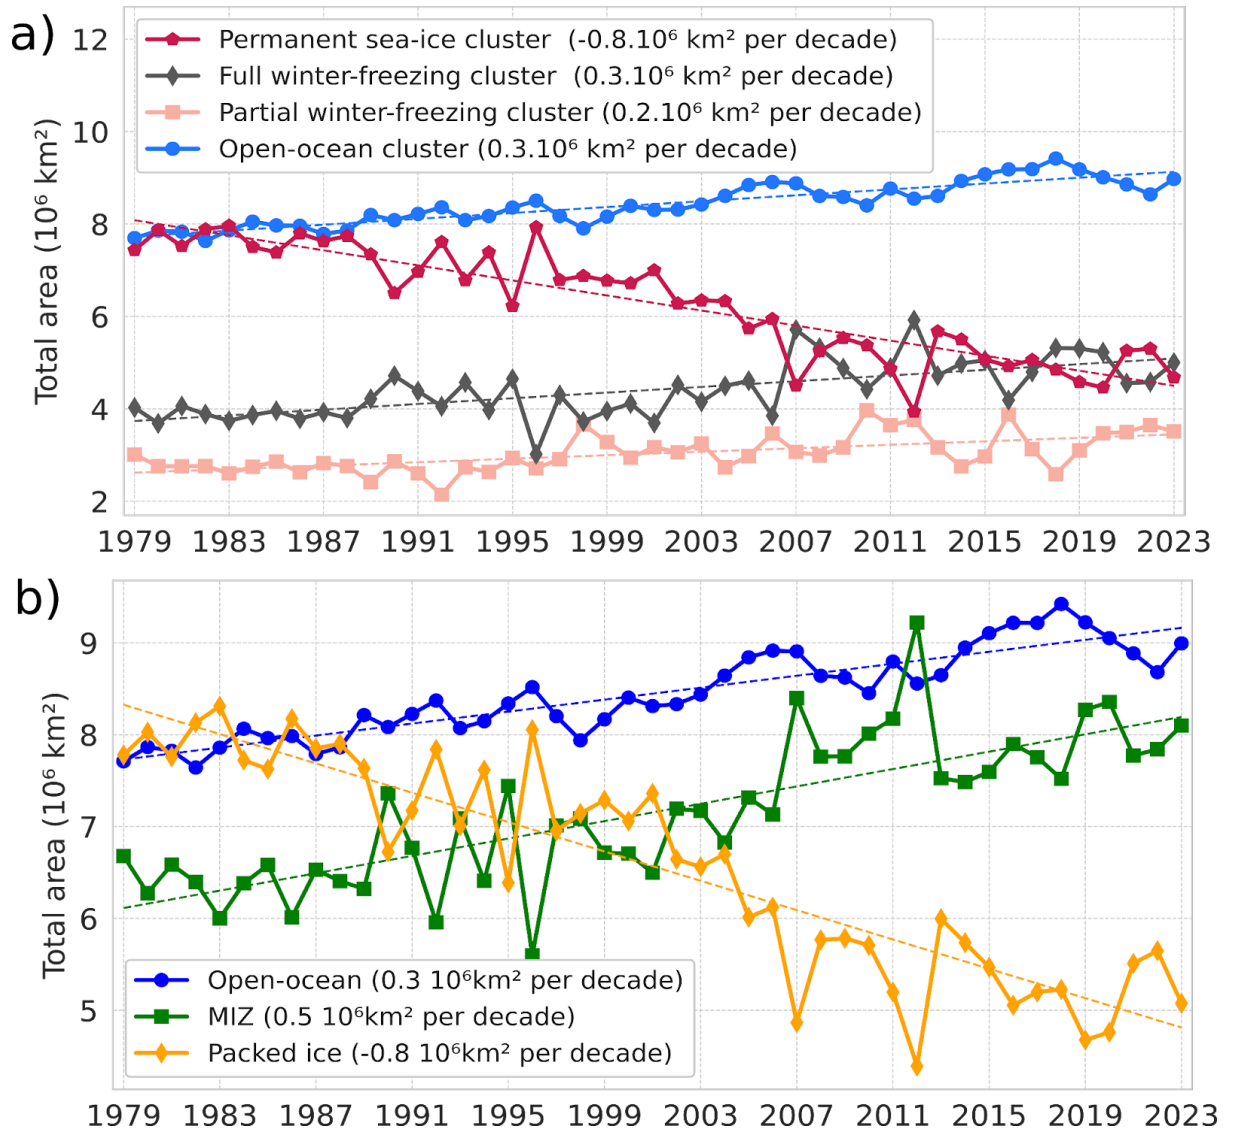

601

602 Figure 6: (a) Time series of the total area covered by each of the four clusters. (b)  
 603 Times series of the area covered by three categories: packed ice ( $0.8 < \text{SIC} < 1$ ), the  
 604 Marginal Ice Zone (MIZ;  $0.15 < \text{SIC} < 0.8$ ) and the open-ocean ( $\text{SIC} < 0.15$ ). All curves  
 605 show a significant linear trend with a p-value less than 0.05 using a Wald Test with a  
 606 t-distribution.

607

608 • Lines 505-509: it would be good to interpret the fact that 2007 is only visible for  
 609 the permanent cluster, in terms of existing literature that studied this event. In  
 610 fact, we would argue that the signature is also visible in the full winter-freezing  
 611 cluster, in “negative”. That is, the 2007 event seem to be interpretable as a strong  
 612 drop of perennial ice but also as a strong surge of the full winter freezing cluster.  
 613 Why is it so? We would have expected to see a surge of the open water cluster in  
 614 2007, not the winter cluster.

615

616 Thanks. We now say: "Also, looking at the years with marked extremes in September  
617 sea ice extent, (2007, 2012, 2016 and 2020; see introduction), the MIZ  
618 categorization shows a transfer of area between the packed ice and the MIZ. In our  
619 clustering vision, 2007, 2012 and 2020 show a transfer of area between the  
620 permanent sea-ice cluster and full winter-freezing cluster while 2016 show a transfer  
621 of area between the full winter-freezing and the partial winter freezing, reflecting  
622 different dynamical changes in the sea-ice seasonal cycles. Therefore, our clustering  
623 analysis presents a more detailed description of the MIZ category. "

624

625 Fučkar, N. S., Guemas, V., Johnson, N. C., Massonnet, F., & Doblas-Reyes, F. J. (2016).  
626 Clusters of interannual sea ice variability in the northern hemisphere. *Climate*  
627 *Dynamics*, 47(5), 1527–1543. <https://doi.org/10.1007/s00382-015-2917-2>

628

629 Lukovich, J. V., & Barber, D. G. (2007). On the spatiotemporal behavior of sea ice  
630 concentration anomalies in the Northern Hemisphere. *Journal of Geophysical*  
631 *Research: Atmospheres*, 112(D13). <https://doi.org/10.1029/2006JD007836>

632

633 Raphael, M. N., & Hobbs, W. (2014). The influence of the large-scale atmospheric  
634 circulation on Antarctic sea ice during ice advance and retreat seasons:  
635 RAPHAEL AND HOBBS; ANTARCTIC SEA ICE ADVANCE AND RETREAT.  
636 *Geophysical Research Letters*, 41(14), 5037–5045.

637 <https://doi.org/10.1002/2014GL060365>

638

639

640

641

642

643

644

645

646

647

648

649

650

651

652

653

654

655

656

657

658

659

660

661

662

663
