# Supplementary material for: Arctic regional changes revealed by clustering of sea-ice observations
Source: Copernicus journal article supplement (doi:10.5194/egusphere-2025-704), 2025-03-06
Supplement: Supplementary file [file egusphere-2025-704-AC3-supplement.pdf]

1073 Marion Lebrun

#### 1074 General Comments

1075 This paper introduces a novel method for characterizing the seasonality of Arctic sea  
1076 ice. The k-means clustering method, which has been successfully applied in other  
1077 contexts, serves as the foundation for this approach. This study enhances the method  
1078 by incorporating the Mahalanobis distance, providing a more robust physical  
1079 representation of sea ice seasonal cycles. By applying this refined technique to sea  
1080 ice concentration data spanning 1979 to 2023, the authors identify four distinct  
1081 clusters that effectively describe the seasonality of Arctic sea ice.

1082 Building on these results, the authors analyze the probability of individual seasonal  
1083 cycles within the dataset belonging to each of these four clusters. They also  
1084 introduce new diagnostic tools to describe the temporal evolution of sea ice seasonal  
1085 cycles, as well as to pinpoint the moments when a seasonal cycle transitions from one  
1086 cluster to another.

1087 This study offers an innovative approach that complements previous research on sea  
1088 ice seasonality. I commend the authors for the thoroughness of their analysis and the  
1089 clarity of their well-structured manuscript. Overall, I believe this work represents a  
1090 significant contribution to the field and, with the revisions suggested below, has the  
1091 potential for a strong impact upon publication.

1092 While the bibliography section requires attention before submission (as detailed  
1093 later), most of the comments below are intended to enhance the paper's clarity,  
1094 precision, and relevance. Authors are encouraged to consider these suggestions and  
1095 apply them at their discretion.

1096

#### 1097 Major Comments

1098 The only major comment regarding this paper concerns the paragraph between lines  
1099 325 and 339. In my opinion, this paragraph requires further clarification or a more  
1100 detailed presentation of the results to be fully convincing. The results presented in  
1101 this section and reiterated in the conclusion, showing that ice conditions during the  
1102 summer (or winter) are strongly correlated with the onset of melting (or freezing), are  
1103 highly interesting for understanding the mechanisms behind the Arctic sea ice  
1104 seasonal cycle. However, I find that relying solely on clusters to describe these results  
1105 is limiting.

1106 If I understand correctly, the seasonal cycles of each grid point tend to group around  
1107 one (or several, considering the results in Section 3.2) cluster. Therefore, I am not  
1108 fully convinced that the seasonal cycles associated with a particular cluster (as shown  
1109 in Figure 4b) behave exactly as summarized in this paragraph.

1110 I believe it would be helpful to visually demonstrate this with supporting evidence to  
1111 strengthen the argument. For example, you could present the interquartile range  
1112 around each cluster on Figure 4a, using the data already employed to generate Figure

1113 4b. Alternatively, if you prefer not to overload Figure 4a, you could clearly define the  
 1114 melting onset and freezing onset dates here (using concentration thresholds already  
 1115 applied in other studies) and provide statistics of these diagnostics in each cluster. In  
 1116 my opinion, these revisions would significantly enhance the impact and clarity of  
 1117 these results.

1118 Thank you very much for your relevant comment and nice idea. We have further  
 1119 pushed the diagnostic.

1120 To have an idea of the spread of seasonal cycles around each cluster, we have also  
 1121 plotted the median (solid line) together with quantiles 0.90 and 0.10 (dashed line) for  
 1122 each cluster in a supplementary figure.

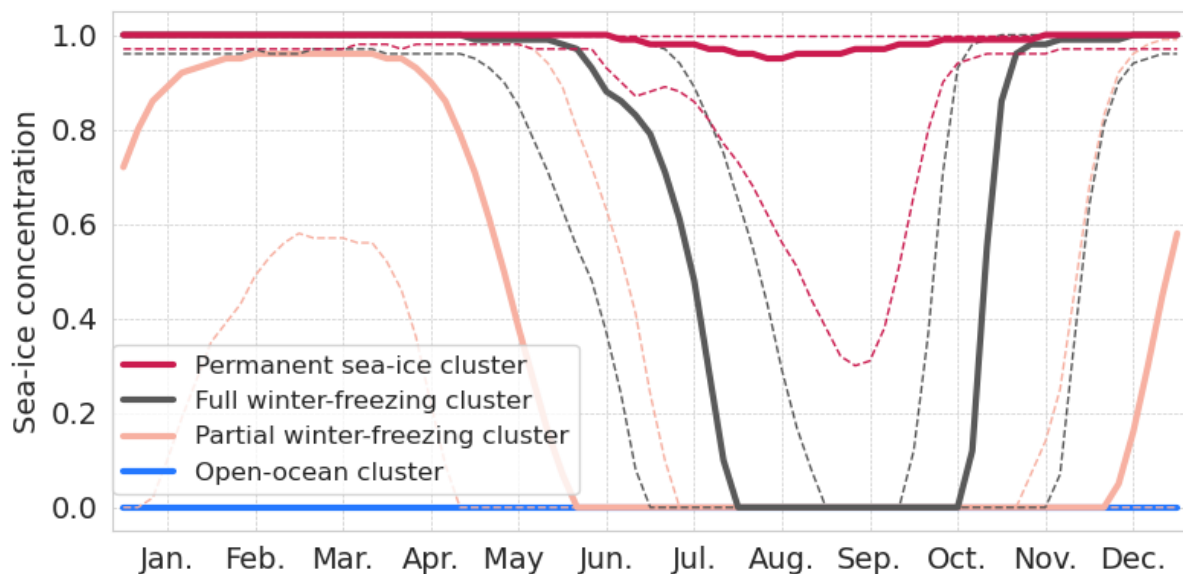

1123

1124 Figure S2: As Fig. 4a, but for the median (solid line) and quantiles 0.10 and 0.90  
 1125 (dashed line)

1126 In the main text, we have added a new figure and interpretation considering the  
 1127 spread for the date of retreat and date of advance.

1128 We now say:

1129 "... Therefore, it seems that, for ice-free conditions in summer, the first date of  
 1130 freezing is a good predictor for the appearance of full ice conditions in the next  
 1131 winter.

1132 However, this suggestion relies solely on the shape of the four types of  
 1133 seasonal cycles but to properly quantify this, the spread must be taken into account.  
 1134 Figure S2 displays the spread of the seasonal cycle by plotting the quantiles 0.1, 0.5  
 1135 and 0.9 of each cluster. To verify our hypothesis on sea-ice predictors, we account for  
 1136 the spread of the date of retreat and date of advance for each cluster. To do so, we

1137 calculate the first date of retreat (the first date after the maximum SIC that is below  
1138 0.9) for each seasonal cycle experiencing fully ice covered conditions (having at least  
1139 one value above 0.99 during the year). We also calculate the first date of advance  
1140 (the first date after the minimum SIC that is above 0.1) for each seasonal cycle  
1141 experiencing ice-free conditions (having at least one value below 0.01 during the  
1142 year). For these calculations, seasonal cycles have been temporally filtered using a 15  
1143 days sliding window in order to get rid of short-term dynamical ice events, as done in  
1144 Lebrun et al., (2019). To circumvent the effect of the discontinuity between 31  
1145 December and 1 January, we define the origin of time in May for the calculation of  
1146 the date of advance. We then label each first date of retreat and first date of advance  
1147 for each seasonal cycle with its corresponding cluster according to our clustering  
1148 analysis (Figure 4a).

1149       The normalized probability over each cluster of the first date of retreat and  
1150 first date of advance at each date is shown Figure 5. This figure also displays the total  
1151 number of the first date of retreat and the first date of advance of all clusters for each  
1152 date. If the first date of retreat occurs between January and April, there is around  
1153 95% of chance to belong to either the open-ocean cluster, the partial winter-freezing  
1154 cluster or full winter freezing cluster, which all present ice-free duration in the  
1155 following summer. However, this situation did not often occur, as the total first date  
1156 of retreat happening in this period is unlikely (solely 5% of first date of retreat for all  
1157 clusters). The first date of retreat is more likely to occur between the beginning of  
1158 April and August, as within this period around 90% of the total date of retreat for all  
1159 clusters exist. A first date of retreats in early June has solely around 10% of chance to  
1160 belong to the permanent sea-ice cluster which do not present ice-free conditions in  
1161 summer while a first date of retreat in early July has around 70% of chance to belong  
1162 to the full winter-freezing cluster which shows ice-free conditions in summer.

1163       The first date of advance is more likely to occur between the beginning of  
1164 August until the beginning of January, as within this period around 90% of the total  
1165 date of advance for all clusters exist. A first date of advance in early September has  
1166 around 95% of chance to belong to the full winter freezing cluster which present fully  
1167 ice covered condition in the following winter, while a first date of advance in early

1168 November has around 80% of chance to belong to the partial winter freezing or open  
 1169 ocean clusters which do not show fully ice covered conditions in the following winter.  
 1170 Therefore, this simple model suggests that the first date of retreat could be a good  
 1171 predictor for ice-free conditions the following summer and the first date of advance a  
 1172 good predictor for fully ice cover conditions the following winter. “

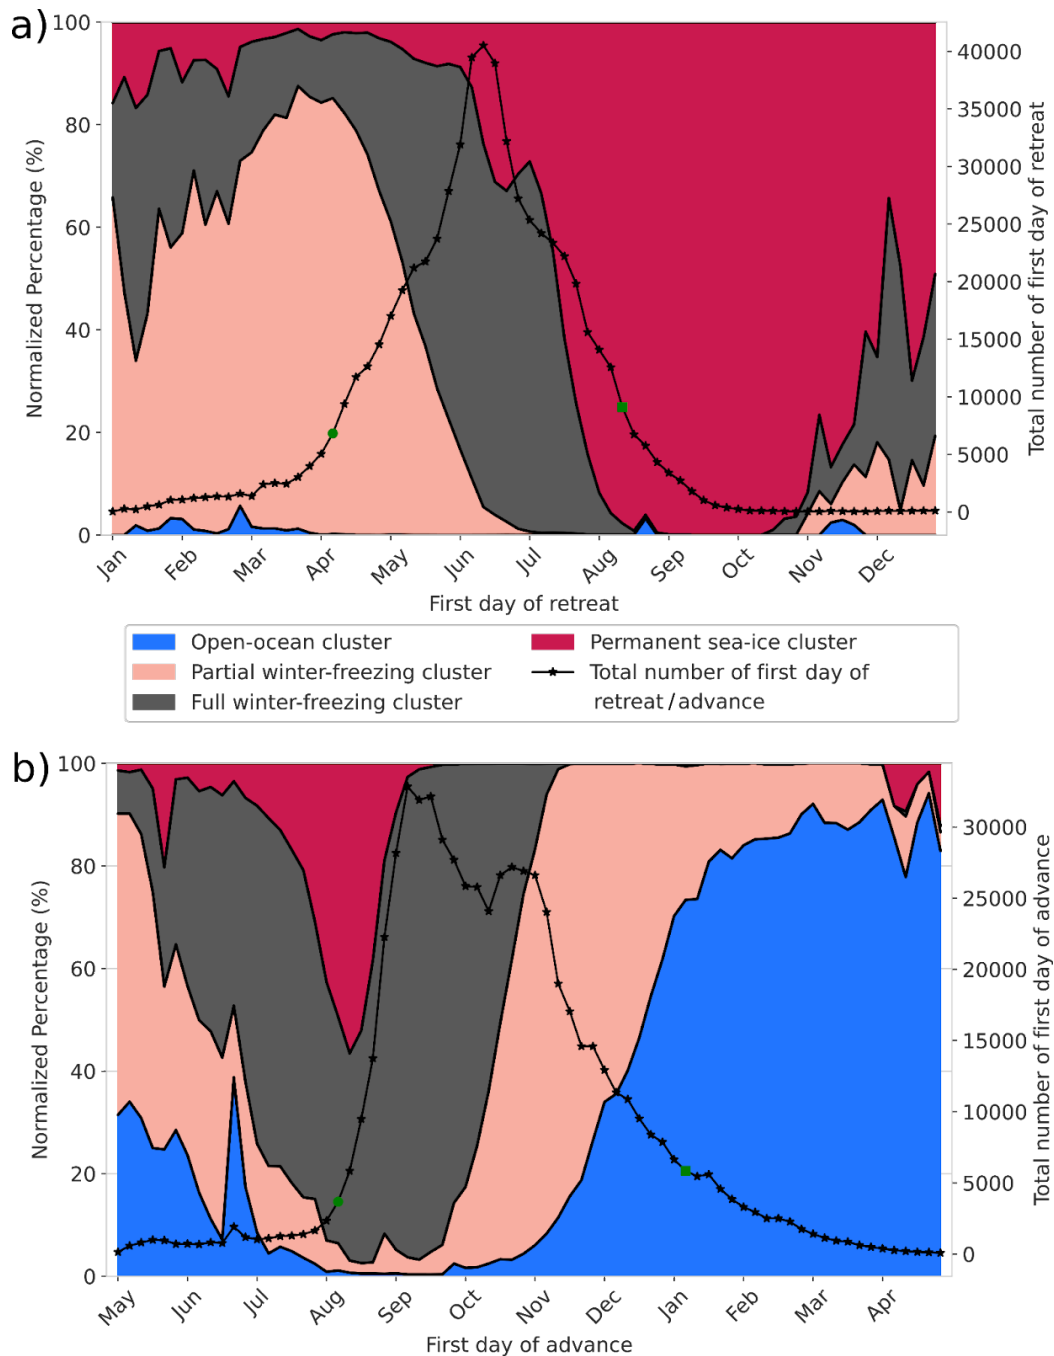

1173

1174 Figure 5: Normalized probability of the first date of retreat (panel a) and first  
 1175 date of advance (panel b) for each cluster. The solid lines with star markers are the  
 1176 total number of first dates of retreat and first dates of advance for each date. The

1177 green circle markers (start date) and green square markers (end date) cover the  
1178 shortest period where around 90% of the first date of retreat, respectively the first  
1179 date of advance, for all clusters occurs.

1180

## 1181 **Specific Comments**

1182 **Lines 137-139 and lines 152-157:** I feel, with both sentences, that the authors try to  
1183 highlight the novelty of their method compared to previous studies, but these  
1184 sentences appear before the work itself is introduced. I am not sure of the relevance  
1185 of these sentences at this point. This creates some confusion during a first reading. I  
1186 suggest either removing these sentences or moving them to a later paragraph, ideally  
1187 after the authors have introduced their work more clearly.

1188 The lines 137-139 (*"Here, in this paper, we describe the evolution of the Arctic by*  
1189 *delimiting spatio-temporal regions having a common type of seasonal cycle."*) and the  
1190 lines 152-157 (*"However, the criteria for the boundaries of these proposed regions are*  
1191 *hard to determine and somewhat arbitrary. The originality of our analysis also resides in*  
1192 *the fact that we regionalize the Arctic based on physical criteria of the dynamics of the*  
1193 *sea-ice seasonal cycle, therefore without imposing predefined regions. To do so, we set up*  
1194 *a clustering method (unsupervised machine learning)"*) and started introducing our work  
1195 in regards to previous work. We think by removing or moving to the last paragraph,  
1196 the originality of our work will be less easy to follow. In this manner, we can easily  
1197 and step by step compare the differences/added value of our work to previous  
1198 studies.

1199

1200 **Lines 200-202:** This statement could benefit from additional evidence (by including  
1201 figures or statistics in the supplementary material, for example).

1202 We agree that the lines 200-202 (*"We choose this 5-day temporal resolution as similar*  
1203 *results are found for a daily temporal resolution whereas a monthly temporal resolution*  
1204 *shows small differences in the spatial distribution of clusters."*) could benefit from  
1205 additional evidence.

1206 We now say: *"We choose this 5-day temporal resolution as similar results are found*  
1207 *for a daily temporal resolution whereas a monthly temporal resolution shows*  
1208 *different numbers of optimal clustering and small differences in the spatial*  
1209 *distribution of clusters (Figure S1)."*

1210 We have included this new figure and associated paragraph in the supplementary

1211

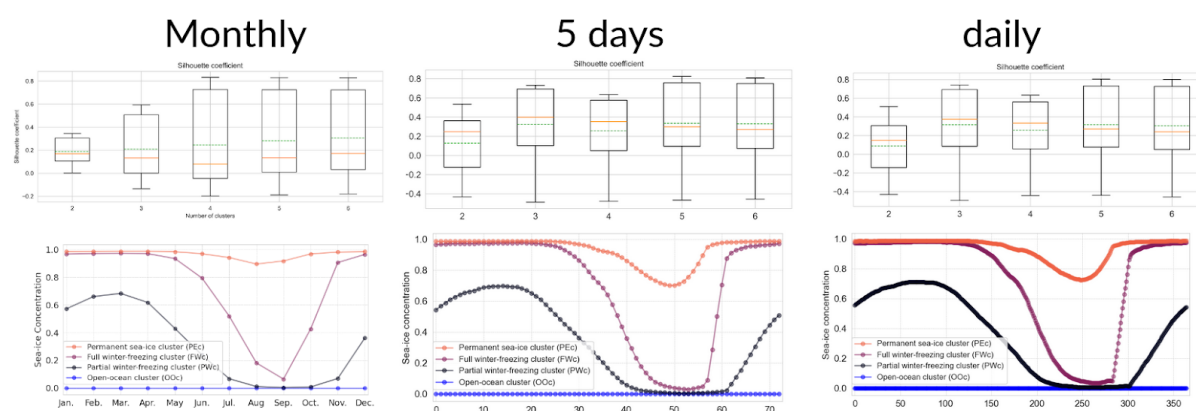

Figure S1: Comparison between monthly (left), 5-day (middle) and daily temporal resolution (right). The Silhouette coefficient for a number of clusters from 2 to 6 (top row), the four types of seasonal cycles (bottom row). In the top row, the box extends from the first quartile (0.25) to the third quartile (0.75) of the Silhouette coefficient. The whiskers indicate the 1st and 99th percentiles. The green-dashed and orange-solid lines indicate the mean and median values, respectively.

The Silhouette coefficient is maximum (so optimal clustering) with 6 clusters with monthly data and for 3 clusters for 5-days and daily data.

**Lines 216-217:** It could help the reader if you briefly explain what you mean by “non-zero seasonal cycle.”

We now say: “We consider all oceanic grid cells above 55°N having a non-zero sea-ice seasonal cycle (having at least a non-zero value for SIC throughout the year)”

**Lines 353:** “consistent and continuous patterns”, consistent according to what?

We have removed “consistent”. We now say: “we retrieve spatially continuous patterns”

**Lines 395-397:** I find it difficult to discern “the edge of the 0.3 probability” in Figure 5 due to the continuous colorbar. Adding a contour line to indicate this boundary could make it clearer.

We think it will unnecessarily overload the plots. We now say: “The edge of the 0.3 probability of belonging to the permanent sea-ice clusters of the period 1979-1993 follows the border of the Marginal Ice Zone (0.8 SIC) located in the Central Arctic (not shown)”

**Figure 5:** I find it difficult to discern the probability differences between clusters when the colorbar changes for each cluster. While I understand your choice to maintain consistency with other figures, for this particular figure, I suggest using a single colorbar for all four clusters to enhance readability.

The figure now has clear separation between probabilities, as we no longer used the Mahalanobis for the calculation of probability. We use the Euclidean distance for that. We still use the Mahalanobis for the clustering though. We now say: “The



1242 Mahalanobis norm, deriving from a symmetric operator, effectively rotates the  
 1243 original physical phase space (here., date of the annual cycle) to align with the data's  
 1244 natural directions—linear combinations of the physical time axis. This transformation  
 1245 allows centroid detection in a space that reflects the intrinsic structure of the data.  
 1246 Therefore, using the Mahalanobis distance helps the clustering algorithm to follow  
 1247 the direction of the correlation and capture the elongated shapes of clusters. When  
 1248 calculating the probability to belong to one cluster, we do not need to work with the  
 1249 data's natural directions, but rather work in the original physical time space.  
 1250 Therefore we use Euclidean distance for the calculation of probability and the  
 1251 Mahalanobis for the clustering.”

1252

1253 The new figure : “

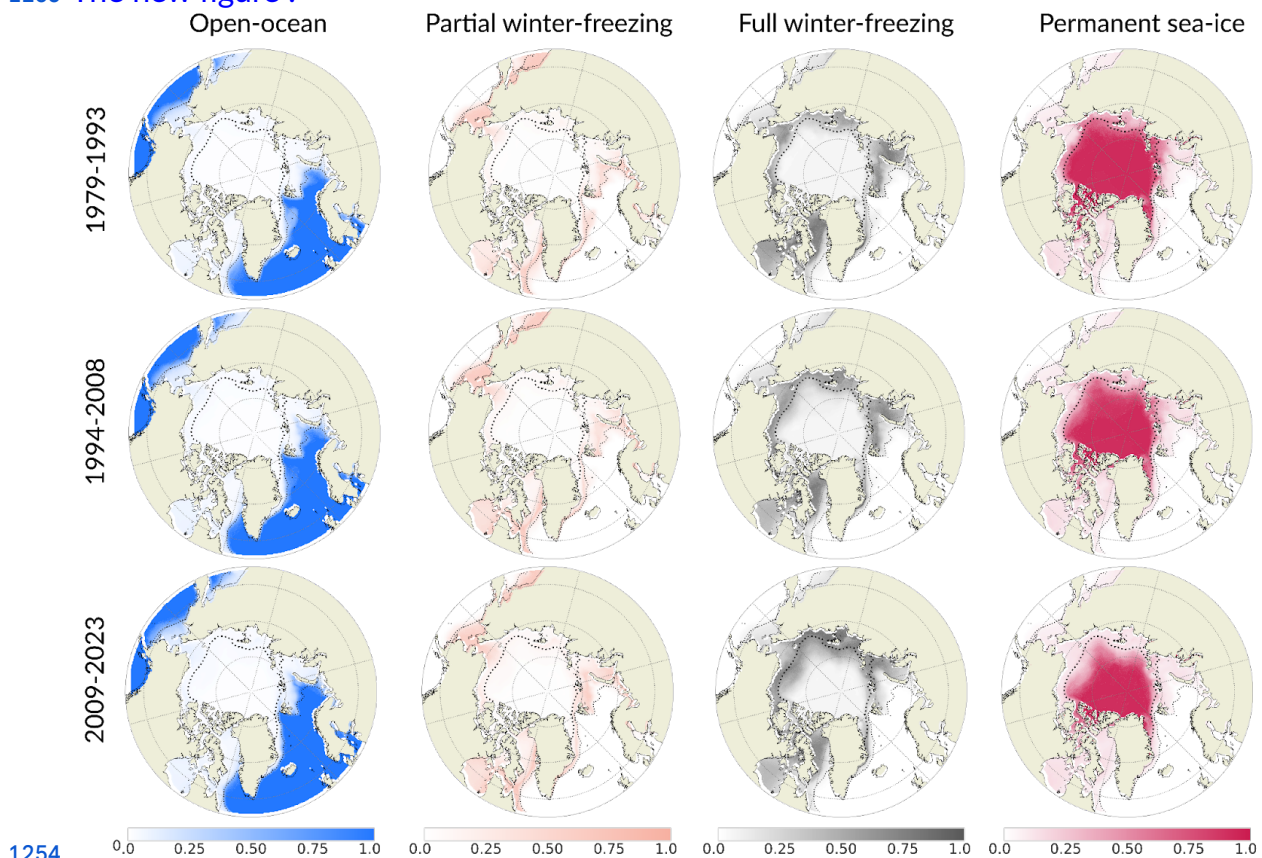

1254  
 1255 Figure 8: Map of the probability of each cluster: open-ocean (first column), partial  
 1256 winter-freezing (second column), full winter-freezing (third column) and permanent  
 1257 sea-ice (fourth column). Rows correspond to three periods of 15 years: 1979-1993  
 1258 (top row), 1994-2008 (middle row) and 2009-2023 (bottom row). The dotted thin and  
 1259 thick lines are the mean SIC of 0.15 and 0.8 for the period 1979-2023, respectively.  
 1260 The circle sitting over the north pole is the pole hole (see section 2.1). ”

1261 **Paragraph 464-476:** The reference to Figure 7 is missing here and should be explicitly  
 1262 mentioned for clarity.

1263 Thank you. We now say: ” The probability of belonging to the open-ocean cluster is

1264 around 40%, to the permanent sea-ice cluster is around 29% and to the full  
1265 winter-freezing cluster is around 18 % and to the partial winter-freezing cluster is  
1266 around 13% (Figure 7)”

1267 **Line 468:** “ *the trend for the other two clusters are statistically significant*”. Does it mean  
1268 that the trends for the partial and full winter-freezing clusters are not significant?

1269 Yes, we have now clarified by saying:”All curves show a significant linear trend with a  
1270 p-value less than 0.05 using a Wald Test with a t-distribution.”

1271 **Lines 476:** “*and to a smaller extent, of the full winter-freezing cluster*”. I am confused by  
1272 this statement. Earlier (line 466), it was mentioned that the trend for the full  
1273 winter-freezing cluster was nearly constant, and line 468 suggests that the trend is  
1274 not significant. This part seems to lack precision to be clearly understood.

1275 Indeed, it was confusing. We have removed this last part of the sentence.

1276 **Lines 502-503:** “*while the partial and full winter-freezing clusters remain relatively*  
1277 *stable*.” I find it unclear in Figure 8a that the total area covered by the partial and, in  
1278 particular, the full-winter cluster is stable. It might be helpful to add the trend for  
1279 each cluster, as was done in Figure 7, to make this clearer.

1280 Thank you very much. We have now computed the trend and significance.



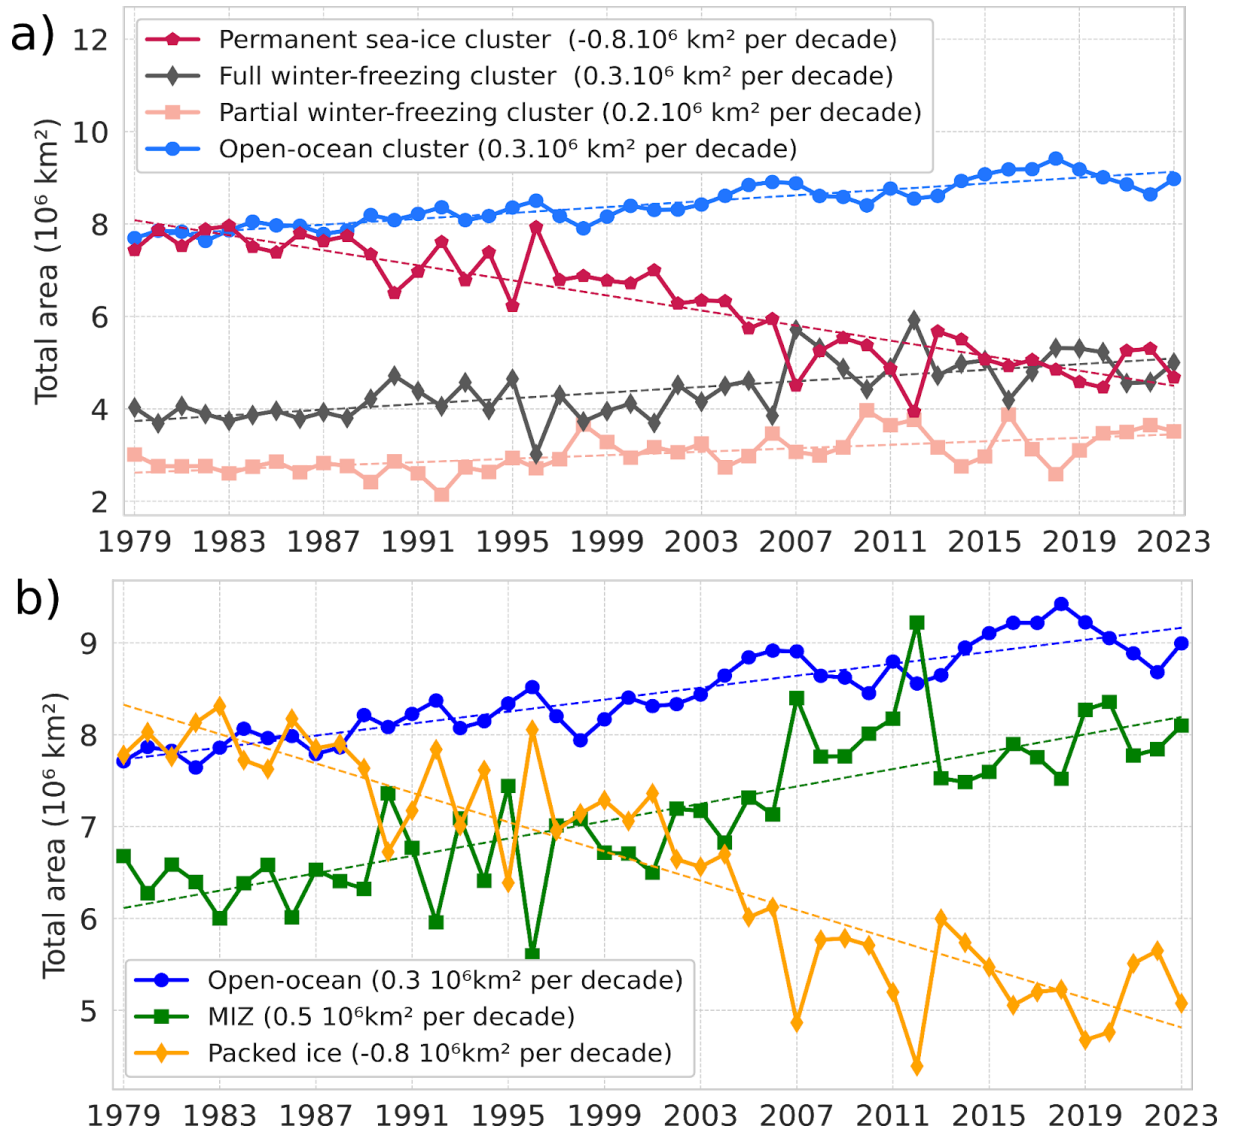

1281

1282 Figure 6: (a) Time series of the total area covered by each of the four clusters. (b)  
 1283 Times series of the area covered by three categories: packed ice ( $0.8 < \text{SIC} < 1$ ), the  
 1284 Marginal Ice Zone (MIZ;  $0.15 < \text{SIC} < 0.8$ ) and the open-ocean ( $\text{SIC} < 0.15$ ). All curves  
 1285 show a significant linear trend with a p-value less than 0.05 using a Wald Test with a  
 1286 t-distribution.

1287 And we now say: "These two methods (Figure 6a and Figure 6b) both indicate a shift  
 1288 toward more seasonal and ice-free conditions. Indeed, in the clustering method the  
 1289 permanent sea-ice cluster has notably decreased of the same amount than the  
 1290 packed ice in the classical categorization ( $-0.8 \cdot 10^6 \text{ km}^2$  per decade). Also, the  
 1291 open-ocean cluster follows the same trend of the open-ocean category ( $0.3 \cdot 10^6 \text{ km}^2$   
 1292 per decade). The increase in the area of MIZ category is around  $0.5 \cdot 10^6 \text{ km}^2$  per  
 1293 decade and has been demonstrated previously (Cocetta et al., 2024; Song et al.,  
 1294 2025). Therefore, it appears with our clustering that the MIZ is refined into two  
 1295 clusters : the full winter-freezing ( $0.3 \cdot 10^6 \text{ km}^2$  per decade) and the partial

1296 winter-freezing cluster ( $0.2 \cdot 10^6 \text{ km}^2$  per decade). This suggests that the tendency is  
1297 more likely to shift to a more abrupt melting and growth seasonal cycle (full  
1298 winter-freezing cluster) compared to a quasi-sinusoidal sea-ice seasonal cycle (partial  
1299 winter-freezing cluster). ”

1300

1301

1302 **Lines 505-509:** I find it difficult to discern the nuances between these two sentences.  
1303 Perhaps the last sentence could be omitted, as it might not add significant value.

1304 We agree. We have removed the last sentence.

1305 **Lines 518-519:** “Sensitivity tests have been performed on this definition, and the results  
1306 do not change when we apply small definition changes (i.e., 9 to 11 years minimum length  
1307 of the same cluster with zero to 2 years of tolerance). ” It would be valuable to include  
1308 the results of these sensitivity tests, perhaps in the supplementary material, to  
1309 provide additional context and support for this statement.

1310 We added the following figure in the supplementary and we now say: “Sensitivity  
1311 tests have been performed on this definition (Figure S2)”

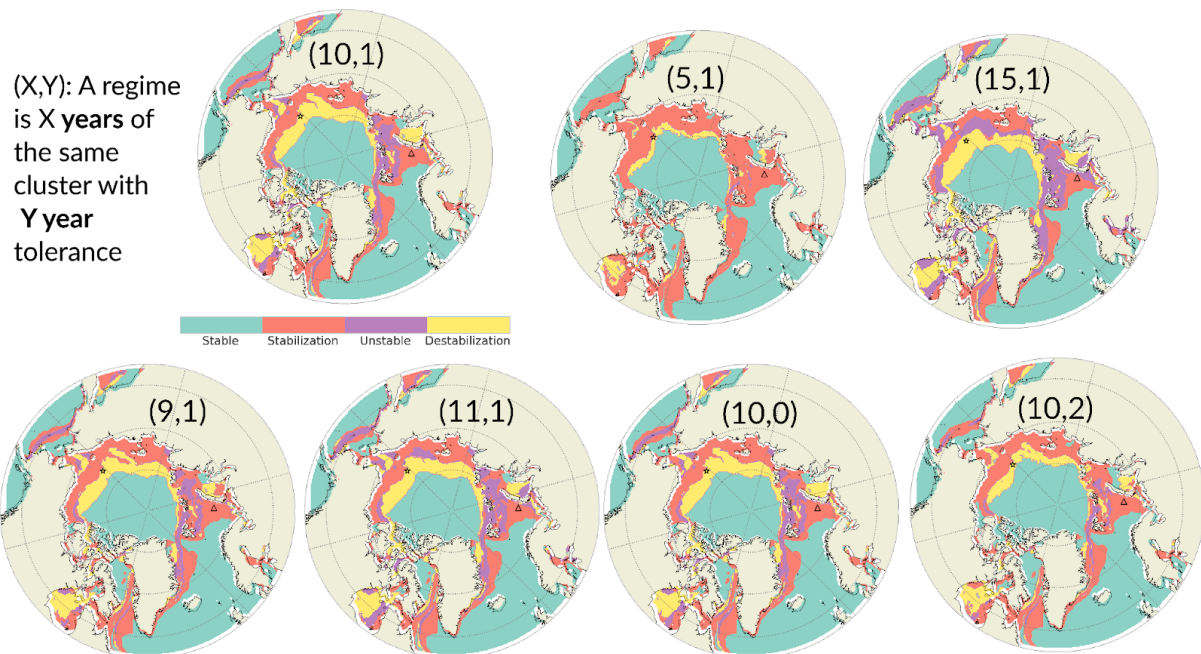

1312

1313 Figure S3: Sensitivity tests on our definition of regime. Same as Figure 11 but with a  
1314 different set of values for the minimum number of consecutive years and tolerance.

1315

1316 **Lines 522-525:** A reference to Figure 9 would enhance clarity here, as the figure  
1317 significantly helps in understanding the definition of these new diagnostics.

1318 Thanks. Figure 9 is now Figure 10. We now say: "Figure 10 illustrates how we define  
1319 the stabilization and destabilization labels."

1320 **Lines 578-582:** I am uncertain about the relevance of this paragraph, as all the  
1321 information presented here seems to be already covered in the previous paragraph.

1322 We agree that the Figure 11d is more a confirmation from the previous paragraph.  
1323 However the Figure 11c does as it allows additional spatial information to which  
1324 seasonal cycle the regions stabilized and informs that it depends on the regions. We  
1325 keep both figures for consistency among the stabilization and destabilization results.  
1326 We have reformulated the paragraph.

1327 We now say: "To describe the stabilization and destabilization regimes, we display the  
1328 dominant cluster (the cluster having the maximum probability) during the stable  
1329 phase of these two regimes (early period for the destabilization regime and late  
1330 period for the stabilization period; Figure 12c and 12d). "

#### 1331 **References section :**

1332 I noticed that several references cited in the paper are missing from the reference list.  
1333 I've compiled a list of the missing references I found, but I strongly recommend that  
1334 the author carefully review this section, as there may be other errors that I may have  
1335 missed. Additionally, the format of the references is not consistent throughout the  
1336 section. For example, the publication date is sometimes listed immediately after the  
1337 authors' names, and in other cases, it appears at the end of the reference. To ensure  
1338 consistency, I suggest following the EGU standardized citation format.

1339 Thank you very much. We have now completed the missing references and ensure  
1340 that the year is right after the name's author in a consistent way.

#### 1341 **Missing reference in the references section :**

1342 Ardyna and Arrigo, 2020: line 83

1343 Eisenman, 2010: line 439 ; 693

1344 Eyring et al., 2021: line 77

1345 Lebrun et al., 2019: line 125 ; 137 ; 631 ; 648

1346 Meier et al., 2007: line 146

1347 Markus et al., 2009: line 127 ; 629

1348 Maze et al., 2017: line 161

1349 Parkinson and Cavalieri, 2008: line 678

1350 Parkinson et al., 1987: line 304

1351 Parkinson et al., 1999: line 677

1352 Parkinson, 2014: line 127

1353 Peixoto and Oort, 1992: line 683

1354 Peng and Meier, 2018: line 146

1355 Regan et al., 2023: line 119

1356 **Lines 803-805:** Houghton and Wilson 2020 should appears before Huntington et al.,  
1357 2017
